# Supplementary material for: A trisulfur radical anion (S3˙−) involved sulfur insertion reaction of 1,3-enynes: sulfide sources control chemoselective synthesis of 2,3,5-trisubstituted thiophenes and 3-thienyl disulfides
Source: Royal Society of Chemistry journal article supplement (doi:10.1039/c9cc03604k), 2019-01-01

*Supporting information for*

**Trisulfur Radical Anion ( $S_3^{\cdot-}$ ) Involved Sulfur Insertion Reaction of 1,3-Enynes:  
Sulfide Sources Control Chemoselective Synthesis of 2,3,5-trisubstituted  
Thiophenes and 3-thienyl Disulfides**

Jing-Hao Li,<sup>a</sup> Qi Huang,<sup>a</sup> Weidong Rao,<sup>b</sup> Shun-Yi Wang,<sup>\*,a</sup> and Shun-Jun Ji<sup>\*,a</sup>

<sup>a</sup>Key Laboratory of Organic Synthesis of Jiangsu Province, College of Chemistry, Chemical Engineering and Materials Science, and Collaborative Innovation Center of Suzhou Nano Science and Technology, Soochow University, Suzhou, 215123, China.

<sup>b</sup>Jiangsu Key Laboratory of Biomass-based Green Fuels and Chemicals, College of Chemical Engineering, Nanjing Forestry University, Nanjing 210037, China.

E-mail: shunyi@suda.edu.cn; shunjun@suda.edu.cn

## Table of Contents

|                                                                                    |     |
|------------------------------------------------------------------------------------|-----|
| 1. General Information.....                                                        | S3  |
| 2. Synthesis of But-1-en-3-yne-1,2,4-triyltribenzene <b>1aa</b> .....              | S3  |
| 3. Synthesis of 2,3,5-triphenylthiophene <b>3aa</b> .....                          | S3  |
| 4. Synthesis of 1,2-bis(2,4,5-triphenylthiophen-3-yl)disulfane <b>4aa</b> .....    | S4  |
| 5. Screenings of two Reactions' Conditions.....                                    | S4  |
| 6. Deuterated Experiment.....                                                      | S5  |
| 7. Spectroscopic Data of Compounds.....                                            | S6  |
| 8. Unsuccessful examples.....                                                      | S13 |
| 9. Copies of <sup>1</sup> H NMR and <sup>13</sup> C NMR Spectra for Compounds..... | S14 |
| 10. X-ray Structure of <b>4aa</b> .....                                            | S39 |
| 11. The reaction of 1,4-enynes.....                                                | S39 |
| 12. The reaction of <b>1aa</b> under other conditions.....                         | S40 |

## 1. General Information

Unless otherwise noted, all commercially available compounds were used as provided without further purification. Solvents for chromatography were analytical grade and used without further purification. Analytical thin-layer chromatography (TLC) was performed on silica gel, visualized by irradiation with UV light. For column chromatography, 200-300 mesh silica gel was used.  $^1\text{H}$ -NMR and  $^{13}\text{C}$ -NMR were recorded on a BRUKER 400 MHz spectrometer in  $\text{CDCl}_3$ . Chemical shifts ( $\delta$ ) were reported referenced to an internal tetramethylsilane standard or the  $\text{CDCl}_3$  residual peak ( $\delta$  7.26) for  $^1\text{H}$  NMR. Chemical shifts of  $^{13}\text{C}$  NMR are reported relative to  $\text{CDCl}_3$  ( $\delta$  77.16). Data are reported in the following order: chemical shift ( $\delta$ ) in ppm; multiplicities are indicated s (singlet), bs (broad singlet), d (doublet), t (triplet), m (multiplet); coupling constants (J) are in Hertz (Hz). Melting points were measured on an Electrothermal digital melting point apparatus and were uncorrected. IR spectra were recorded on a BRUKER VERTEX 70 spectrophotometer and are reported in terms of frequency of absorption ( $\text{cm}^{-1}$ ). HRMS spectra were obtained by using BRUKER MICROTOF-Q III instrument with EI source.

## 2. Synthesis of But-1-en-3-yne-1,2,4-triyltribenzene 1aa

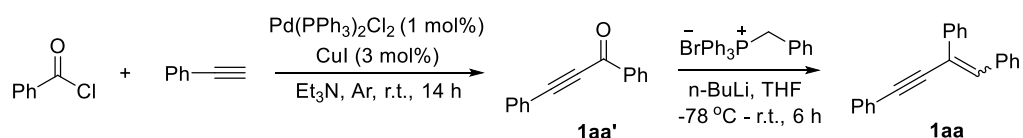

To a 50 mL Schlenk tube was added  $\text{CuI}$  (0.0286 g, 0.15 mmol),  $\text{Pd}(\text{PPh}_3)_2\text{Cl}_2$  (0.0351 g, 0.05 mmol), and  $\text{Et}_3\text{N}$  (10 mL) under an Ar atmosphere. Then, ethynylbenzene (0.5107 g, 5.0 mmol, 1.0 equiv) was added. Benzoyl chloride (0.9137 g, 6.5 mmol, 1.3 equiv) was added dropwise to the reaction mixture. After stirred at r.t. for 14 hours, the mixture was quenched with  $\text{H}_2\text{O}$  (10 mL). The aqueous layer was extracted with  $\text{AcOEt}$ . The combined organic layer was washed with brine, and dried over  $\text{Na}_2\text{SO}_4$ , then, filtered. After concentration under vacuum, the crude mixture was subjected to silica gel column chromatography (hexane/ $\text{AcOEt}$  = 20:1) to obtain 1,3-diphenylprop-2-yn-1-one **1aa'** (4.25 mmol, 85%) as yellow solid.

A 50-mL two-necked flask, containing a magnetic stirring bar, was flame-dried under vacuum and filled with Argon after cooling to room temperature. To this flask were Benzyltriphenylphosphonium bromide (2.2533 g, 5.2 mmol, 1.3 equiv) and dry THF (10 mL). After cooling to  $-78^\circ\text{C}$ ,  $n\text{-BuLi}$  (2.5 M, 1.92 mL, 4.8 mmol, 1.2 equiv) was added dropwise to the reaction mixture at  $-78^\circ\text{C}$ . The mixture was stirred at r.t. for 1 h. Then, a solution of 1,3-diphenylprop-2-yn-1-one **1aa'** (0.8250 g, 4.0 mmol, 1.0 equiv) in dry THF (5 mL) was added. And the mixture was further stirred at r.t. for 5 h. The reaction was quenched by adding saturated  $\text{NH}_4\text{Cl}$  aqueous solution. The mixture was extracted with  $\text{CH}_2\text{Cl}_2$ , dried over with  $\text{Na}_2\text{SO}_4$ , and concentrated under reduced pressure. The crude product was purified by flash column chromatography (hexane/ $\text{AcOEt}$  = 100:1) to afford But-1-en-3-yne-1,2,4-triyltribenzene **1aa** (3.2 mmol, 80%) as a light yellow solid.

## 3. Synthesis of 2,3,5-triphenylthiophene 3aa

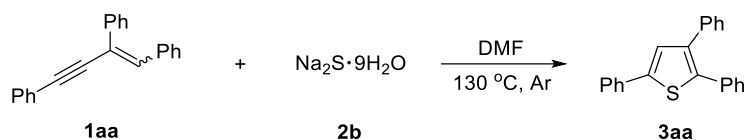

A mixture of But-1-en-3-yne-1,2,4-triyltribenzene **1aa** (0.3 mmol) and  $\text{Na}_2\text{S}\cdot 9\text{H}_2\text{O}$  **2b** (1.2 mmol) in 2.0 mL DMF was stirred under an Ar atmosphere at 130 °C for 7 h. After completion of the reaction, as indicated by TLC, water (15 mL) was added, and the solution was extracted with ethyl acetate ( $3 \times 15$  mL). The organic layers were combined, and dried over sodium sulfate. The pure product was obtained by flash column chromatography using n-hexane on silica gel to afford **3aa** in 87% yield. All remaining 2,3,5-trisubstituted thiophenes (except **3ag**) were prepared using a procedure similar to that used to synthesize **3aa**. The **3ag** was purified by flash column chromatography (hexane/EtOAc = 4:1).

#### 4. Synthesis of 1,2-bis(2,4,5-triphenylthiophen-3-yl)disulfane 4aa

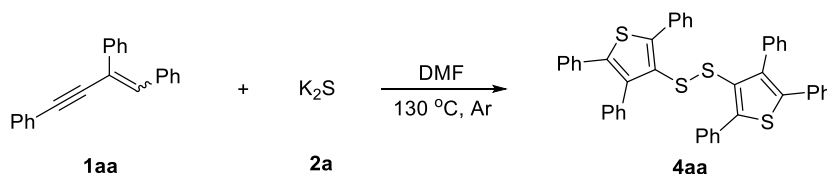

A mixture of But-1-en-3-yne-1,2,4-triyltribenzene **1aa** (0.5 mmol) and  $\text{K}_2\text{S}$  **2a** (2.0 mmol) in 2.0 mL DMF was stirred under an Ar atmosphere at 130 °C for 5 h. After completion of the reaction, as indicated by TLC, water (15 mL) was added, and the solution was extracted with ethyl acetate ( $3 \times 15$  mL). The organic layers were combined, and dried over sodium sulfate. The pure product was obtained by flash column chromatography using hexane/EtOAc (100:1) on silica gel to afford **4aa** in 73% yield. All remaining 3-thienyl disulfides (except **4ag**) were prepared using a procedure similar to that used to synthesize **4aa**. The **4ag** was purified by flash column chromatography (hexane/EtOAc = 3:1).

#### 5. Screenings of two Reactions' Conditions

**Table 1. Optimization for the Formation of 3aa**

| <div style="display: flex; justify-content: space-around; align-items: center;"> <div style="text-align: center;"> <math display="block">\text{1aa}</math> </div> <div>+</div> <div style="text-align: center;"> <math display="block">\text{Na}_2\text{S}\cdot 9\text{H}_2\text{O}</math> </div> <div> <math display="block">\xrightarrow[\text{Ar, temp.}]{\text{solvent}}</math> </div> <div style="text-align: center;"> <math display="block">\text{3aa}</math> </div> </div> |                     |                     |             |                                      |
|------------------------------------------------------------------------------------------------------------------------------------------------------------------------------------------------------------------------------------------------------------------------------------------------------------------------------------------------------------------------------------------------------------------------------------------------------------------------------------|---------------------|---------------------|-------------|--------------------------------------|
| Entry                                                                                                                                                                                                                                                                                                                                                                                                                                                                              | Solvent<br>(2.0 mL) | Temperature<br>(°C) | Time<br>(h) | Yield <sup>b</sup> (%)<br><b>3aa</b> |
| 1                                                                                                                                                                                                                                                                                                                                                                                                                                                                                  | DMF                 | 130                 | 8           | 87                                   |
| 2 <sup>c</sup>                                                                                                                                                                                                                                                                                                                                                                                                                                                                     | DMF                 | 130                 | 8           | 70                                   |
| 3                                                                                                                                                                                                                                                                                                                                                                                                                                                                                  | DMSO                | 130                 | 8           | 54                                   |
| 4                                                                                                                                                                                                                                                                                                                                                                                                                                                                                  | DMA                 | 130                 | 8           | 78                                   |
| 5                                                                                                                                                                                                                                                                                                                                                                                                                                                                                  | DMF                 | 60                  | 8           | 0                                    |

|          |            |            |          |           |
|----------|------------|------------|----------|-----------|
| 6        | DMF        | 110        | 8        | 80        |
| 7        | DMF        | 140        | 8        | 85        |
| 8        | DMF        | 130        | 5        | 73        |
| <b>9</b> | <b>DMF</b> | <b>130</b> | <b>7</b> | <b>87</b> |

<sup>a</sup>Reaction Conditions: **1aa** (0.3 mmol), **2b** (1.2 mmol), solvent (2.0 mL), under Ar. <sup>b</sup>Isolated yield.

<sup>c</sup>Without Ar protecting.

**Table 2. Optimization for the Formation of 4aa**

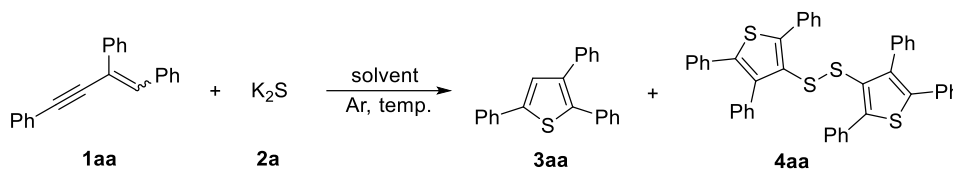

| Entry          | Solvent    | Temperature | Time     | Yield <sup>b</sup> (%) |           |
|----------------|------------|-------------|----------|------------------------|-----------|
|                | (2.0 mL)   | (°C)        | (h)      | 3aa                    | 4aa       |
| 1              | DMF        | 130         | 8        | 24                     | 73        |
| 2 <sup>c</sup> | DMF        | 130         | 8        | messy                  | 56        |
| 3              | DMSO       | 130         | 8        | 36                     | 53        |
| 4              | DMA        | 130         | 8        | 57                     | 42        |
| 5              | DMF        | 60          | 8        | 15                     | 13        |
| 6              | DMF        | 110         | 8        | 28                     | 59        |
| 7              | DMF        | 140         | 8        | 24                     | 70        |
| 8              | DMF        | 130         | 6        | 24                     | 72        |
| <b>9</b>       | <b>DMF</b> | <b>130</b>  | <b>5</b> | <b>24</b>              | <b>73</b> |

<sup>a</sup>Reaction conditions: **1aa** (0.3 mmol), **2a** (1.2 mmol), solvent (2.0 mL), under Ar. <sup>b</sup>Isolated yield.

<sup>c</sup>Without Ar protecting.

## 6. Deuterated Experiment

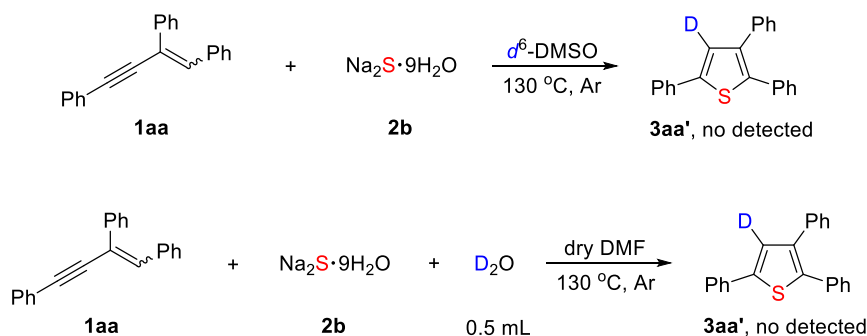

## 7. Spectroscopic Data of Compounds

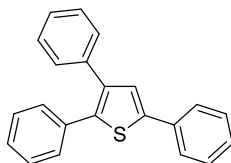

**3aa**

### 2,3,5-triphenylthiophene (3aa)

Yield = 87% (81.5 mg). White solid. Mp: 135.2-136.0 °C. **<sup>1</sup>H NMR** (400 MHz, CDCl<sub>3</sub>) δ 7.67 – 7.62 (m, 2H), 7.44 – 7.23 (m, 14H). **<sup>13</sup>C NMR** (100 MHz, CDCl<sub>3</sub>) δ 142.7, 139.1, 138.1, 136.7, 134.3, 134.2, 129.3, 129.2, 129.1, 128.6, 128.5, 127.8, 127.6, 127.2, 126.6, 125.7. **IR (ATR):** ν = 1597, 1484, 1071, 846, 756, 695, 464 cm<sup>-1</sup>; **HRMS** (EI): calcd. for C<sub>22</sub>H<sub>16</sub>S [M+H]<sup>+</sup>: 313.1051, found: 313.1044.

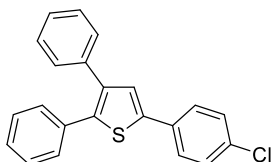

**3ab**

### 5-(4-chlorophenyl)-2,3-diphenylthiophene (3ab)

Yield = 73% (76.0 mg). White solid. Mp: 161.4-162.1 °C. **<sup>1</sup>H NMR** (400 MHz, CDCl<sub>3</sub>) δ 7.52 – 7.44 (m, 2H), 7.33 – 7.17 (m, 13H). **<sup>13</sup>C NMR** (100 MHz, CDCl<sub>3</sub>) δ 141.2, 139.2, 138.4, 136.5, 134.1, 133.4, 132.6, 129.2, 129.2, 129.1, 128.6, 128.5, 127.7, 127.2, 126.9, 126.8. **IR (ATR):** ν = 2357, 1443, 1090, 1013, 828, 759, 695, 499 cm<sup>-1</sup>; **HRMS** (EI): calcd. for C<sub>22</sub>H<sub>15</sub>ClS [M+H]<sup>+</sup>: 347.0661, found: 347.0670.

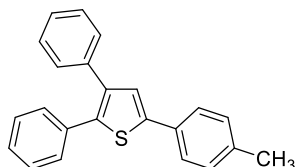

**3ac**

### 2,3-diphenyl-5-(p-tolyl)thiophene (3ac)

Yield = 74% (72.5 mg). White solid. Mp: 109.3-110.2 °C. **<sup>1</sup>H NMR** (400 MHz, CDCl<sub>3</sub>) δ 7.52 (d, *J* = 8.2 Hz, 2H), 7.42 – 7.10 (m, 13H), 2.34 (s, 3H). **<sup>13</sup>C NMR** (100 MHz, CDCl<sub>3</sub>) δ 142.9, 139.0, 137.6, 137.5, 136.8, 134.4, 131.4, 129.7, 129.2, 129.2, 128.6, 128.5, 127.5, 127.1, 126.1, 125.6, 21.3. **IR (ATR):** ν = 1597, 1487, 1069, 809, 757, 691, 481 cm<sup>-1</sup>; **HRMS** (EI): calcd. for C<sub>23</sub>H<sub>16</sub>S [M+H]<sup>+</sup>: 327.1207, found: 327.1202.

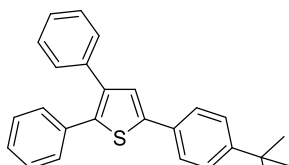

**3ad**

**5-(4-(tert-butyl)phenyl)-2,3-diphenylthiophene (3ad)**

Yield = 72% (79.6 mg). Light yellow solid. Mp: 100.5-101.1 °C. <sup>1</sup>H NMR (400 MHz, CDCl<sub>3</sub>) δ 7.61 – 7.54 (m, 2H), 7.44 – 7.39 (m, 2H), 7.37 – 7.22 (m, 11H), 1.36 – 1.32 (m, 9H). <sup>13</sup>C NMR (100 MHz, CDCl<sub>3</sub>) δ 150.9, 142.8, 139.0, 137.6, 136.8, 134.5, 131.5, 129.3, 129.2, 128.6, 128.5, 127.5, 127.1, 126.3, 126.0, 125.5, 34.8, 31.4. IR (ATR): ν = 2949, 1490, 823, 755, 695, 532, 507 cm<sup>-1</sup>; HRMS (EI): calcd. for C<sub>26</sub>H<sub>24</sub>S [M+H]<sup>+</sup>: 369.1677, found: 369.1674.

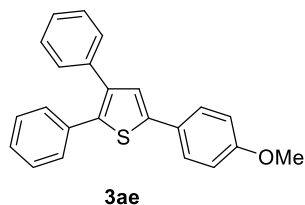**5-(4-methoxyphenyl)-2,3-diphenylthiophene (3ae)**

Yield = 81% (83.2 mg). White solid. Mp: 116.7-117.2 °C. <sup>1</sup>H NMR (400 MHz, CDCl<sub>3</sub>) δ 7.56 (d, *J* = 8.8 Hz, 2H), 7.34 – 7.20 (m, 11H), 6.92 (d, *J* = 8.8 Hz, 2H), 3.81 (s, 3H). <sup>13</sup>C NMR (100 MHz, CDCl<sub>3</sub>) δ 159.5, 142.7, 139.0, 137.1, 136.8, 134.4, 129.2(3), 129.1(9), 128.6, 128.5, 127.4, 127.0(7), 127.0(6), 127.0(1), 125.7, 114.5, 55.5. IR (ATR): ν = 1599, 1488, 1251, 1029, 827, 693, 499 cm<sup>-1</sup>; HRMS (EI): calcd. for C<sub>23</sub>H<sub>18</sub>OS [M+H]<sup>+</sup>: 343.1157, found: 343.1151.

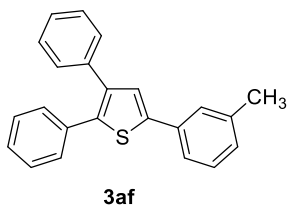**2,3-diphenyl-5-(m-tolyl)thiophene (3af)**

Yield = 78% (76.4 mg). Light yellow solid. Mp: 64.9-66.0 °C. <sup>1</sup>H NMR (400 MHz, CDCl<sub>3</sub>) δ 7.45 – 7.39 (m, 2H), 7.34 – 7.27 (m, 5H), 7.27 – 7.16 (m, 7H), 7.05 (d, *J* = 7.6 Hz, 1H), 2.33 (s, 3H). <sup>13</sup>C NMR (100 MHz, CDCl<sub>3</sub>) δ 142.8, 139.0, 138.6, 137.9, 136.7, 134.4, 134.1, 129.2, 129.2, 128.9, 128.5(4), 128.4(8), 127.5, 127.1, 126.5, 126.4, 122.8, 21.6. IR (ATR): ν = 1599, 1481, 1442, 1068, 781, 692, 500, 438 cm<sup>-1</sup>; HRMS (EI): calcd. for C<sub>23</sub>H<sub>18</sub>S [M+H]<sup>+</sup>: 327.1207, found: 327.1205.

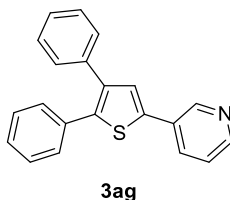**3-(4,5-diphenylthiophen-2-yl)pyridine (3ag)**

Yield = 83% (78.0 mg). White solid. Mp: 97.9-98.6 °C. <sup>1</sup>H NMR (400 MHz, CDCl<sub>3</sub>) δ 8.93 (s, 1H), 8.54 (s, 1H), 7.93 – 7.88 (m, 1H), 7.41 (s, 1H), 7.38 – 7.26 (m, 11H). <sup>13</sup>C NMR (100 MHz, CDCl<sub>3</sub>) δ 148.5, 146.6, 139.3(1), 139.2(8), 138.5, 136.2, 133.8, 132.6, 130.2, 129.2, 129.1, 128.6, 128.5, 127.8, 127.6, 127.3, 123.7. IR (ATR): ν = 1474, 1416, 1021, 812, 767, 700, 613, 496 cm<sup>-1</sup>; HRMS (EI): calcd. for C<sub>21</sub>H<sub>15</sub>NS [M+H]<sup>+</sup>: 314.1003, found: 314.1002.

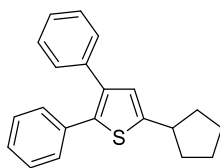

**3ah**

**5-cyclopentyl-2,3-diphenylthiophene (3ah)**

Yield = 82% (74.9 mg). Yellow oil.  $^1\text{H NMR}$  (400 MHz,  $\text{CDCl}_3$ )  $\delta$  7.32 – 7.17 (m, 10H), 6.87 (d,  $J$  = 1.0 Hz, 1H), 3.25 (d,  $J$  = 8.3 Hz, 1H), 2.15 (td,  $J$  = 6.7, 6.0, 4.0 Hz, 1H), 1.90 – 1.63 (m, 6H).  $^{13}\text{C NMR}$  (100 MHz,  $\text{CDCl}_3$ )  $\delta$  149.6, 137.6, 137.1, 135.6, 134.9, 129.3, 129.2, 128.5, 128.4, 127.1, 126.8, 126.4, 41.4, 35.5, 25.3. **IR (ATR):**  $\nu$  = 2950, 1599, 1496, 1068, 837, 755, 693, 548  $\text{cm}^{-1}$ ; **HRMS (EI):** calcd. for  $\text{C}_{21}\text{H}_{20}\text{S}$   $[\text{M}+\text{H}]^+$ : 305.1364, found: 305.1369.

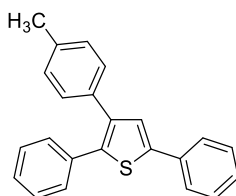

**3ba**

**2,5-diphenyl-3-(p-tolyl)thiophene (3ba)**

Yield = 87% (85.2 mg). White solid. Mp: 90.1–91.3  $^{\circ}\text{C}$ .  $^1\text{H NMR}$  (400 MHz,  $\text{CDCl}_3$ )  $\delta$  7.67 – 7.56 (m, 2H), 7.42 – 7.31 (m, 5H), 7.30 – 7.17 (m, 6H), 7.09 (d,  $J$  = 7.8 Hz, 2H), 2.33 (s, 3H).  $^{13}\text{C NMR}$  (100 MHz,  $\text{CDCl}_3$ )  $\delta$  142.5, 139.1, 137.7, 136.8, 134.5, 134.3, 133.8, 129.2(6), 129.2(5), 129.1, 129.0, 128.6, 127.7, 127.5, 126.7, 125.7, 21.3. **IR (ATR):**  $\nu$  = 1593, 1485, 1025, 813, 760, 684, 548, 463  $\text{cm}^{-1}$ ; **HRMS (EI):** calcd. for  $\text{C}_{23}\text{H}_{18}\text{S}$   $[\text{M}+\text{H}]^+$ : 327.1207, found: 327.1201.

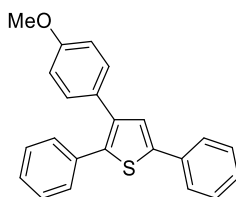

**3bb**

**3-(4-methoxyphenyl)-2,5-diphenylthiophene (3bb)**

Yield = 74% (76.0 mg). White solid. Mp: 80.6–81.2  $^{\circ}\text{C}$ .  $^1\text{H NMR}$  (400 MHz,  $\text{CDCl}_3$ )  $\delta$  7.71 – 7.52 (m, 2H), 7.44 – 7.30 (m, 5H), 7.30 – 7.20 (m, 6H), 6.86 – 6.76 (m, 2H), 3.77 (s, 3H).  $^{13}\text{C NMR}$  (100 MHz,  $\text{CDCl}_3$ )  $\delta$  158.8, 142.5, 138.7, 137.3, 134.5, 134.3, 130.3, 129.2, 129.1, 129.0, 128.6, 127.7, 127.4, 126.6, 125.7, 114.0, 55.31. **IR (ATR):**  $\nu$  = 1595, 1486, 1286, 1173, 1031, 818, 692, 462  $\text{cm}^{-1}$ ; **HRMS (EI):** calcd. for  $\text{C}_{23}\text{H}_{18}\text{OS}$   $[\text{M}+\text{H}]^+$ : 343.1157, found: 343.1161.

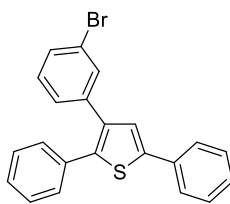

**3bc**

**3-(3-bromophenyl)-2,5-diphenylthiophene (3bc)**

Yield = 67% (78.7 mg). White solid. Mp: 91.2-92.4 °C. **<sup>1</sup>H NMR** (400 MHz, CDCl<sub>3</sub>) δ 7.65 – 7.57 (m, 2H), 7.51 (t, *J* = 1.8 Hz, 1H), 7.40 – 7.33 (m, 3H), 7.33 – 7.23 (m, 7H), 7.18 – 7.14 (m, 1H), 7.09 (t, *J* = 7.8 Hz, 1H). **<sup>13</sup>C NMR** (100 MHz, CDCl<sub>3</sub>) δ 143.0, 138.9, 138.6, 137.3, 134.0, 133.8, 131.9, 130.1, 130.0, 129.2, 129.1, 128.7, 127.9(3), 127.8(9), 127.8(6), 126.1, 125.7, 122.6. **IR (ATR)**: ν = 1590, 1476, 1069, 788, 689, 615, 486, 438 cm<sup>-1</sup>; **HRMS** (EI): calcd. for C<sub>22</sub>H<sub>15</sub>BrS [M+H]<sup>+</sup>: 391.0156, found: 391.0145.

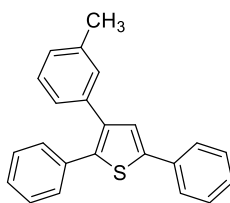

**3bd**

**2,5-diphenyl-3-(m-tolyl)thiophene (3bd)**

Yield = 77% (75.4 mg). White solid. Mp: 75.9-76.8 °C. **<sup>1</sup>H NMR** (400 MHz, CDCl<sub>3</sub>) δ 7.69 – 7.59 (m, 2H), 7.41 – 7.30 (m, 5H), 7.27 – 7.02 (m, 8H), 2.29 (s, 3H). **<sup>13</sup>C NMR** (100 MHz, CDCl<sub>3</sub>) δ 142.5, 139.2, 138.1, 138.0, 136.6, 134.4, 134.2, 129.8, 129.2, 129.1, 128.5, 128.4, 127.9, 127.7, 127.5, 126.7, 126.4, 125.7, 21.56. **IR (ATR)**: ν = 1597, 1481, 1031, 789, 755, 689, 463, 440 cm<sup>-1</sup>; **HRMS** (EI): calcd. for C<sub>23</sub>H<sub>18</sub>S [M+H]<sup>+</sup>: 327.1207, found: 327.1213.

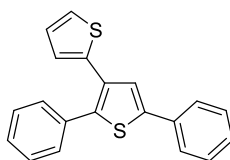

**3be**

**2',5'-diphenyl-2,3'-bithiophene (3be)**

Yield = 89% (85.0 mg). White solid. Mp: 91.4-92.5 °C. **<sup>1</sup>H NMR** (400 MHz, CDCl<sub>3</sub>) δ 7.64 – 7.53 (m, 2H), 7.47 – 7.21 (m, 9H), 7.15 – 7.10 (m, 1H), 6.95 – 6.84 (m, 2H). **<sup>13</sup>C NMR** (100 MHz, CDCl<sub>3</sub>) δ 142.8, 138.3, 138.1, 134.0, 133.9, 131.7, 129.8, 129.1, 128.6, 128.1, 127.9, 127.3, 125.9, 125.8, 125.7, 124.9. **IR (ATR)**: ν = 1485, 1216, 827, 762, 694, 486 cm<sup>-1</sup>; **HRMS** (EI): calcd. for C<sub>20</sub>H<sub>14</sub>S<sub>2</sub> [M+H]<sup>+</sup>: 319.0615, found: 319.0613.

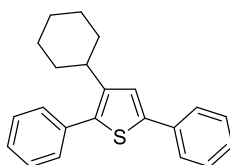

**3bf**

**3-cyclohexyl-2,5-diphenylthiophene (3bf)**

Yield = 76% (72.6 mg). White solid. Mp: 82.6-84.1 °C. **<sup>1</sup>H NMR** (400 MHz, CDCl<sub>3</sub>) δ 7.66 – 7.56 (m, 2H), 7.47 – 7.24 (m, 9H), 2.84 – 2.69 (m, 1H), 1.94 – 1.60 (m, 6H), 1.58 – 1.30 (m, 4H). **<sup>13</sup>C NMR** (100 MHz, CDCl<sub>3</sub>) δ 145.3, 142.6, 136.8, 134.7, 131.7, 129.6, 129.0, 128.7, 127.5, 127.4, 125.7, 123.5, 38.1, 34.8, 26.8, 26.3. **IR (ATR):** ν = 2921, 1594, 1486, 1442, 838, 755, 495 cm<sup>-1</sup>; **HRMS** (EI): calcd. for C<sub>22</sub>H<sub>22</sub>S [M+H]<sup>+</sup>: 319.1520, found: 319.1529.

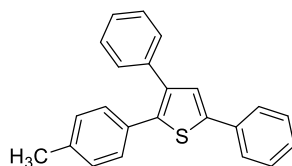**3ca****3,5-diphenyl-2-(p-tolyl)thiophene (3ca)**

Yield = 74% (72.5 mg). White solid. Mp: 99.9-101.0 °C. **<sup>1</sup>H NMR** (400 MHz, CDCl<sub>3</sub>) δ 7.71 (d, *J* = 7.6 Hz, 2H), 7.49 – 7.27 (m, 11H), 7.16 – 7.10 (m, 2H), 2.39 (s, 3H). **<sup>13</sup>C NMR** (100 MHz, CDCl<sub>3</sub>) δ 142.3, 138.7, 137.4, 136.9, 134.3, 131.4, 129.3, 129.2, 129.1, 129.0, 128.5, 127.6, 127.0, 126.6, 125.7, 21.34. **IR (ATR):** ν = 1485, 1028, 816, 755, 695, 517, 475 cm<sup>-1</sup>; **HRMS** (EI): calcd. for C<sub>23</sub>H<sub>18</sub>S [M+H]<sup>+</sup>: 327.1207, found: 327.1214.

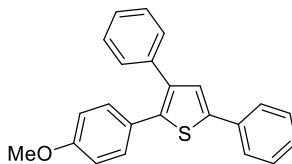**3cb****2-(4-methoxyphenyl)-3,5-diphenylthiophene (3cb)**

Yield = 71% (72.9 mg). White solid. Mp: 78.3-79.2 °C. **<sup>1</sup>H NMR** (400 MHz, CDCl<sub>3</sub>) δ 7.69 – 7.55 (m, 2H), 7.42 – 7.21 (m, 11H), 6.87 – 6.70 (m, 2H), 3.77 (s, 3H). **<sup>13</sup>C NMR** (100 MHz, CDCl<sub>3</sub>) δ 159.2, 141.9, 138.4, 138.1, 136.8, 134.3, 130.5, 129.2, 129.0, 128.5, 127.6, 127.0, 126.8, 126.5, 125.6, 114.1, 55.34. **IR (ATR):** ν = 1599, 1501, 1179, 1029, 825, 754, 528, 477 cm<sup>-1</sup>; **HRMS** (EI): calcd. for C<sub>23</sub>H<sub>18</sub>OS [M+H]<sup>+</sup>: 343.1157, found: 343.1159.

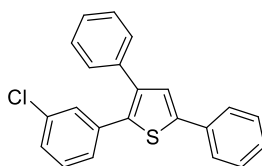**3cc****2-(3-chlorophenyl)-3,5-diphenylthiophene (3cc)**

Yield = 66% (68.7 mg). White solid. Mp: 74.5-76.1 °C. **<sup>1</sup>H NMR** (400 MHz, CDCl<sub>3</sub>) δ 7.64 – 7.56 (m, 2H), 7.40 – 7.23 (m, 10H), 7.20 – 7.09 (m, 3H). **<sup>13</sup>C NMR** (100 MHz, CDCl<sub>3</sub>) δ 143.3, 139.9, 136.2, 136.1(1), 136.1(0), 134.4, 133.9, 129.7, 129.1, 129.0, 128.6, 127.9, 127.5, 127.4(1), 127.3(8), 126.6, 125.7. **IR (ATR):** ν = 1588, 1478, 1095, 788, 752, 693, 542, 440 cm<sup>-1</sup>; **HRMS** (EI): calcd. for C<sub>22</sub>H<sub>15</sub>ClS [M+H]<sup>+</sup>: 347.0661, found: 347.0655.

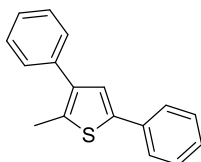

**3cd**

**2-methyl-3,5-diphenylthiophene (3cd)**

Yield = 31% (23.3 mg). Light yellow solid. **Mp**: 56.7-57.4 °C. **<sup>1</sup>H NMR** (400 MHz, CDCl<sub>3</sub>) δ 7.61 – 7.54 (m, 2H), 7.45 – 7.29 (m, 7H), 7.28 – 7.19 (m, 2H), 2.50 (s, 3H). **<sup>13</sup>C NMR** (100 MHz, CDCl<sub>3</sub>) δ 140.1, 139.8, 136.8, 134.5, 134.0, 129.0, 128.7, 128.6, 127.3, 127.0, 125.6, 125.2, 14.46. **IR (ATR)**: ν = 2921, 1598, 1445, 1073, 844, 755, 590, 468 cm<sup>-1</sup>; **HRMS** (EI): calcd. for C<sub>17</sub>H<sub>14</sub>S [M+H]<sup>+</sup>: 251.0894, found: 251.0891.

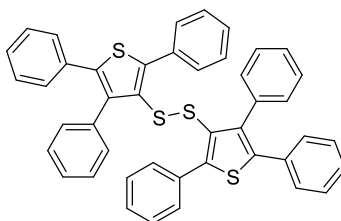

**4aa**

**1,2-bis(2,4,5-triphenylthiophen-3-yl)disulfane (4aa)**

Yield = 73% (75.2 mg). White solid. **Mp**: 119.8-120.1 °C. **<sup>1</sup>H NMR** (400 MHz, CDCl<sub>3</sub>) δ 7.36 – 7.29 (m, 10H), 7.20 (m, 12H), 7.14 – 7.09 (m, 4H), 7.01 – 6.88 (m, 4H). **<sup>13</sup>C NMR** (100 MHz, CDCl<sub>3</sub>) δ 147.9, 142.3, 138.9, 136.0, 133.9, 133.4, 131.2, 129.9, 129.0, 128.4, 128.3, 128.2, 127.9, 127.5, 127.2. **IR (ATR)**: ν = 1444, 1029, 748, 692, 521, 409 cm<sup>-1</sup>.

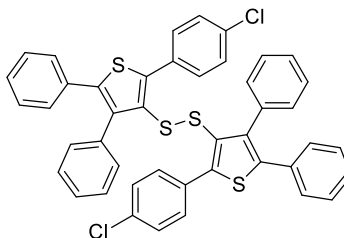

**4ab**

**1,2-bis(2-(4-chlorophenyl)-4,5-diphenylthiophen-3-yl)disulfane (4ab)**

Yield = 35% (39.7 mg). Pale yellow solid. **Mp**: 140.9-141.3 °C. **<sup>1</sup>H NMR** (400 MHz, CDCl<sub>3</sub>) δ 7.33 – 7.28 (m, 8H), 7.24 – 7.18 (m, 12H), 7.12 – 7.07 (m, 4H), 6.93 (d, *J* = 4.8 Hz, 4H). **<sup>13</sup>C NMR** (100 MHz, CDCl<sub>3</sub>) δ 146.2, 142.4, 139.3, 135.8, 134.3, 133.5, 131.8, 131.1, 130.9, 129.0, 128.6, 128.0, 127.8, 127.3. **IR (ATR)**: ν = 1497, 1090, 1013, 829, 696, 498, 416 cm<sup>-1</sup>.

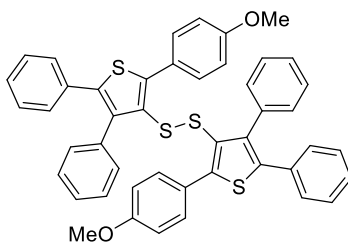

**4ad**

**1,2-bis(2-(4-methoxyphenyl)-4,5-diphenylthiophen-3-yl)disulfane (4ad)**

Yield = 62% (69.5 mg). Pale yellow solid. **Mp**: 180.3-181.2 °C. **<sup>1</sup>H NMR** (400 MHz, CDCl<sub>3</sub>) δ 7.31 – 7.27 (m, 4H), 7.23 – 7.16 (m, 12H), 7.14 – 7.09 (m, 4H), 7.02 – 6.94 (m, 4H), 6.88 – 6.84 (m, 4H), 3.72 (s, 6H). **<sup>13</sup>C NMR** (100 MHz, CDCl<sub>3</sub>) δ 159.7, 147.9, 142.3, 138.1, 136.2, 133.9, 131.2, 131.0, 128.9, 128.4, 128.0, 127.8, 127.4, 127.1, 126.0, 113.8, 55.4. **IR (ATR)**: ν = 1515, 1249, 1031, 830, 692, 510 cm<sup>-1</sup>.

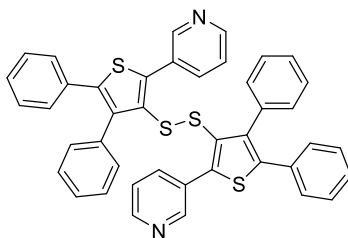

**4ag**

**1,2-bis(4,5-diphenyl-2-(pyridin-3-yl)thiophen-3-yl)disulfane (4ag)**

Yield = 43% (44.4 mg). Pale yellow solid. **Mp**: 173.4-174.1 °C. **<sup>1</sup>H NMR** (400 MHz, CDCl<sub>3</sub>) δ 8.62 (d, *J* = 2.4 Hz, 2H), 8.58 – 8.52 (m, 2H), 7.67 – 7.62 (m, 2H), 7.31 – 7.19 (m, 14H), 7.14 – 7.08 (m, 4H), 7.00 – 6.85 (m, 4H). **<sup>13</sup>C NMR** (100 MHz, CDCl<sub>3</sub>) δ 145.0, 149.0, 143.6, 142.3, 140.1, 136.8, 135.5, 133.3, 131.0, 129.5, 129.0, 128.5, 128.0, 127.9, 127.4, 123.0. **IR (ATR)**: ν = 1443, 1025, 760, 695, 628, 403 cm<sup>-1</sup>.

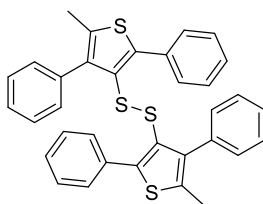

**4cd**

**1,2-bis(5-methyl-2,4-diphenylthiophen-3-yl)disulfane (4cd)**

Yield = 38% (32.1 mg). yellow solid. **Mp**: 116.5-117.3 °C. **<sup>1</sup>H NMR** (400 MHz, CDCl<sub>3</sub>) δ 7.36 – 7.26 (m, 12H), 7.24 – 7.18 (m, 4H), 6.95 – 6.87 (m, 4H), 2.18 (s, 6H). **<sup>13</sup>C NMR** (100 MHz, CDCl<sub>3</sub>) δ 145.5, 142.9, 135.9, 134.4, 133.7, 130.7, 129.9, 128.1, 127.7, 127.6, 127.0, 14.18. **IR (ATR)**: ν = 1482, 1072, 750, 691, 504 cm<sup>-1</sup>.

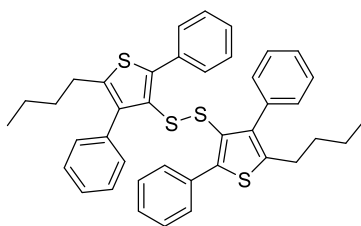

**4ce**

**1,2-bis(5-butyl-2,4-diphenylthiophen-3-yl)disulfane (4ce)**

Yield = 61% (59.6 mg). pale brown oil. **<sup>1</sup>H NMR** (400 MHz, CDCl<sub>3</sub>) δ 7.34 – 7.19 (m, 16H), 7.06 – 6.73 (m, 4H), 2.53 (t, *J* = 7.8 Hz, 4H), 1.54 – 1.46 (m, 4H), 1.26 (q, *J* = 7.7 Hz, 4H), 0.82 (t, *J* = 7.4 Hz, 6H). **<sup>13</sup>C NMR** (100 MHz, CDCl<sub>3</sub>) δ 145.3, 142.7, 140.9, 136.2, 133.9, 130.8, 129.9, 128.2, 127.8, 127.7, 127.1, 127.0, 33.84, 28.49, 22.40, 13.89. **IR (ATR):** ν = 1600, 1442, 1071, 750, 692, 503 cm<sup>-1</sup>.

**8. Unsuccessful examples**

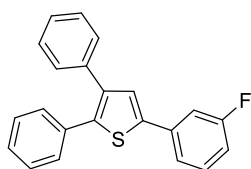

**3ai**

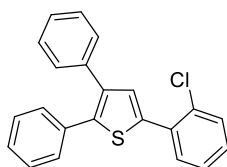

**3aj**

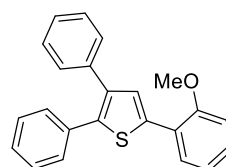

**3ak**

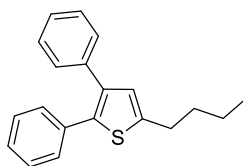

**3al**

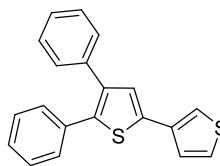

**3am**

## 9. Copies of $^1\text{H}$ NMR and $^{13}\text{C}$ NMR Spectra for Compounds

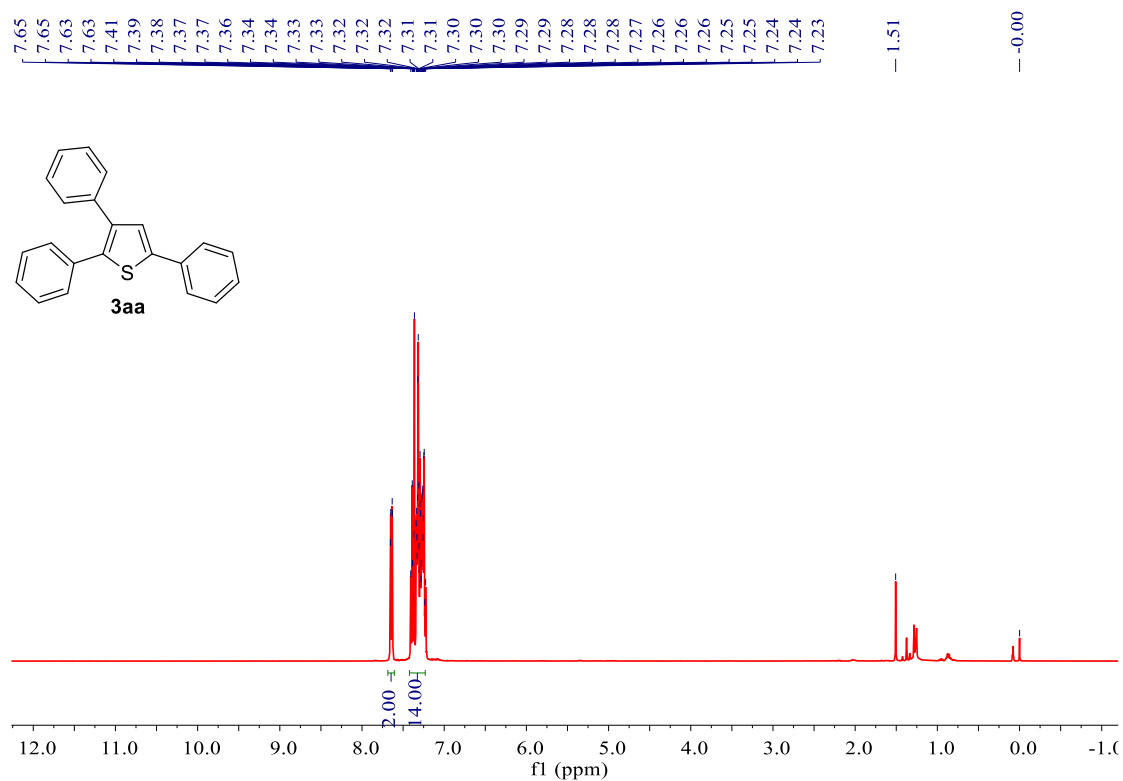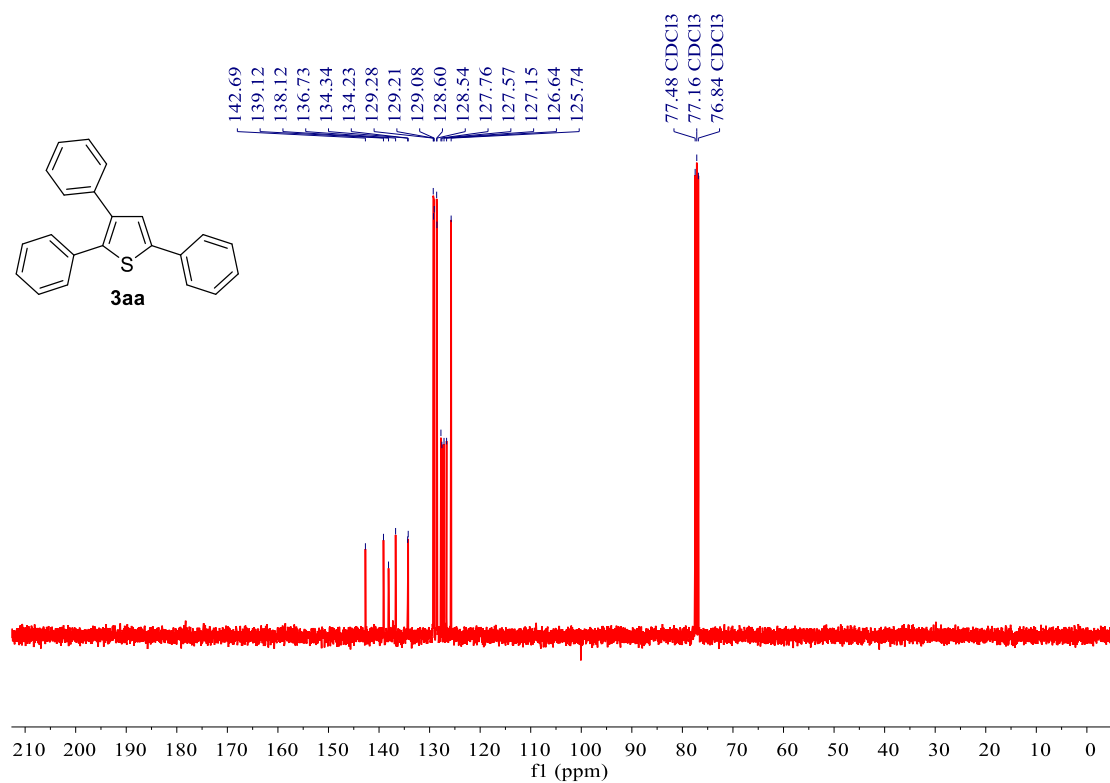

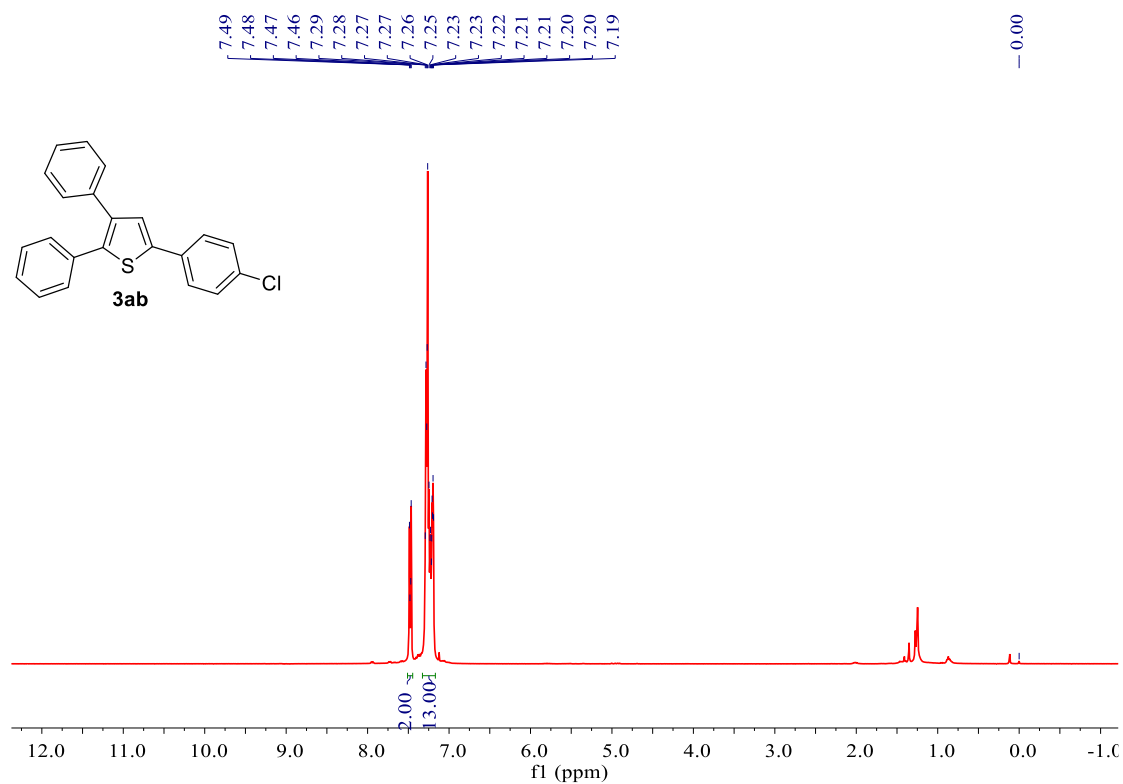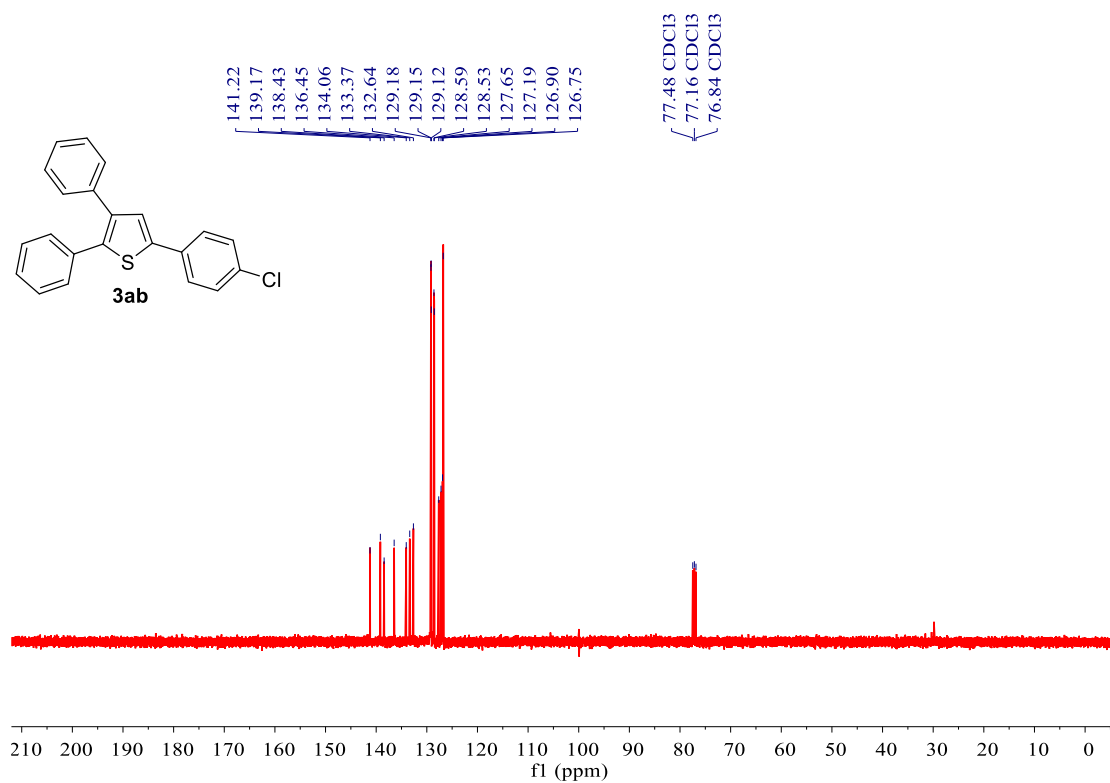

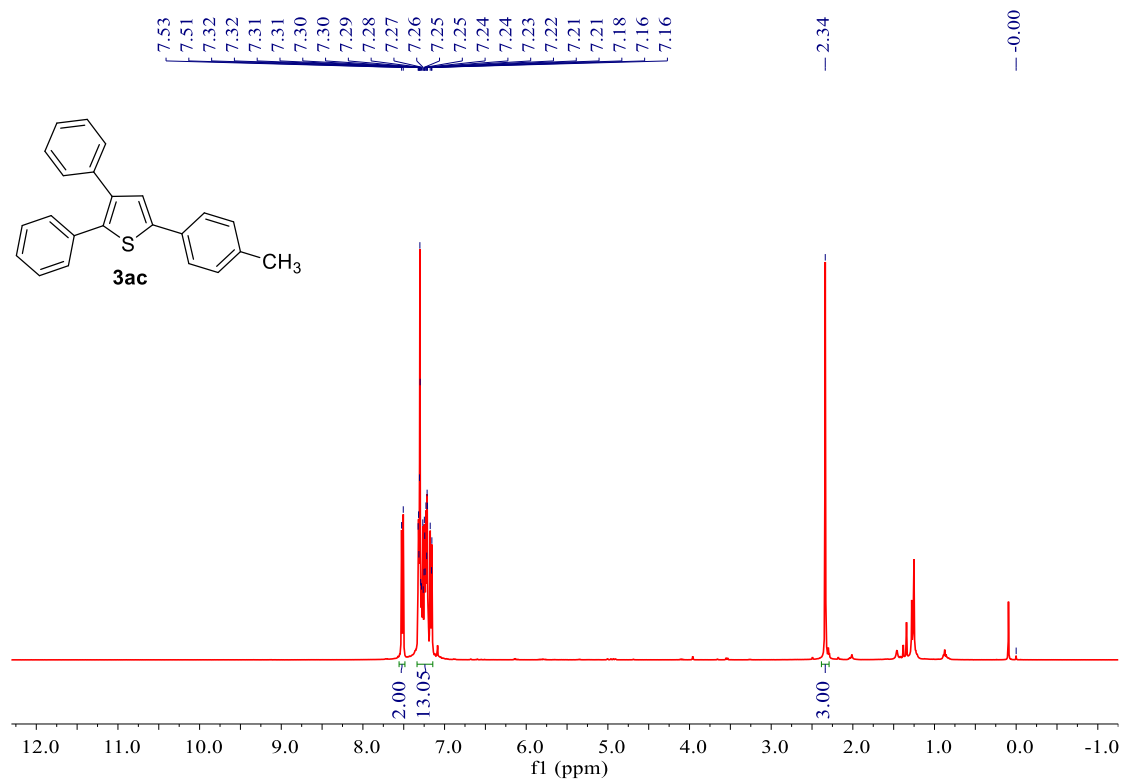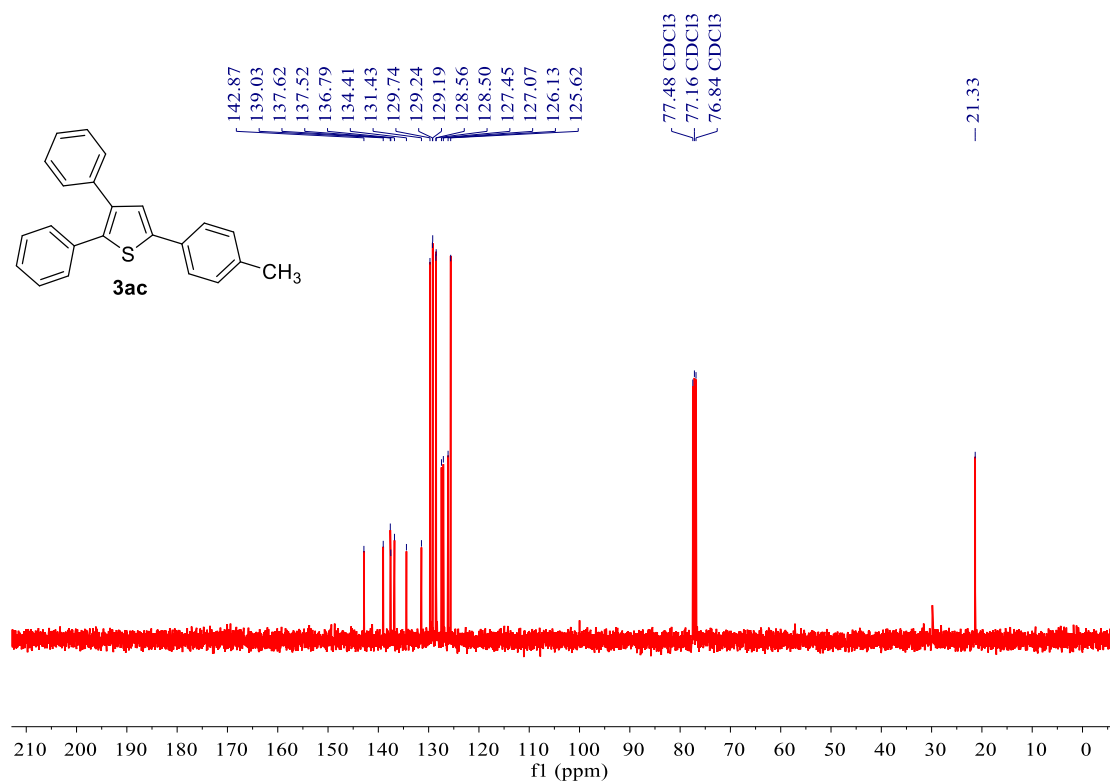

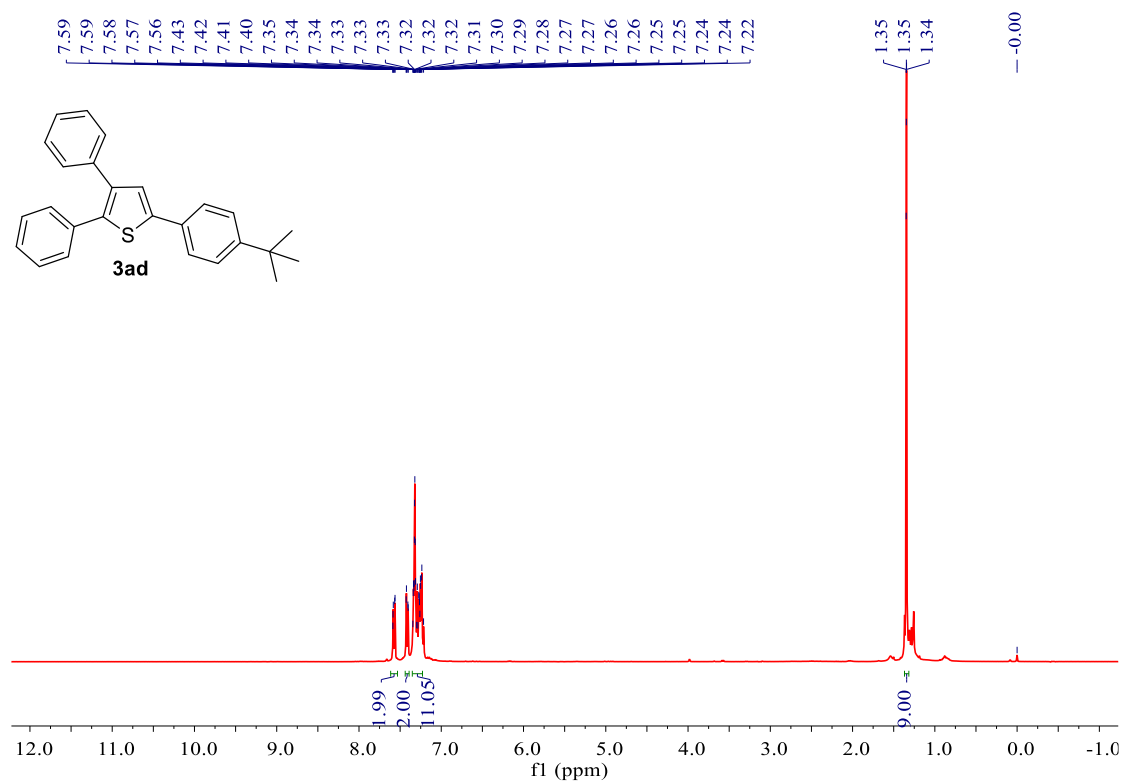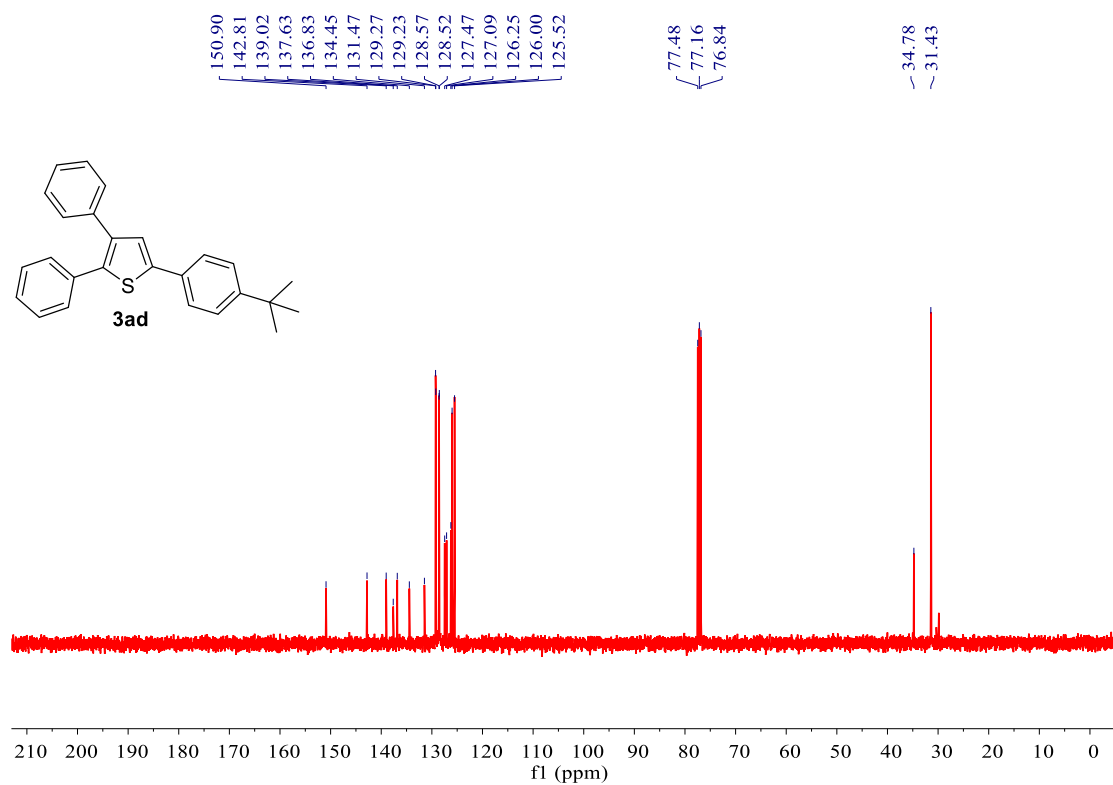

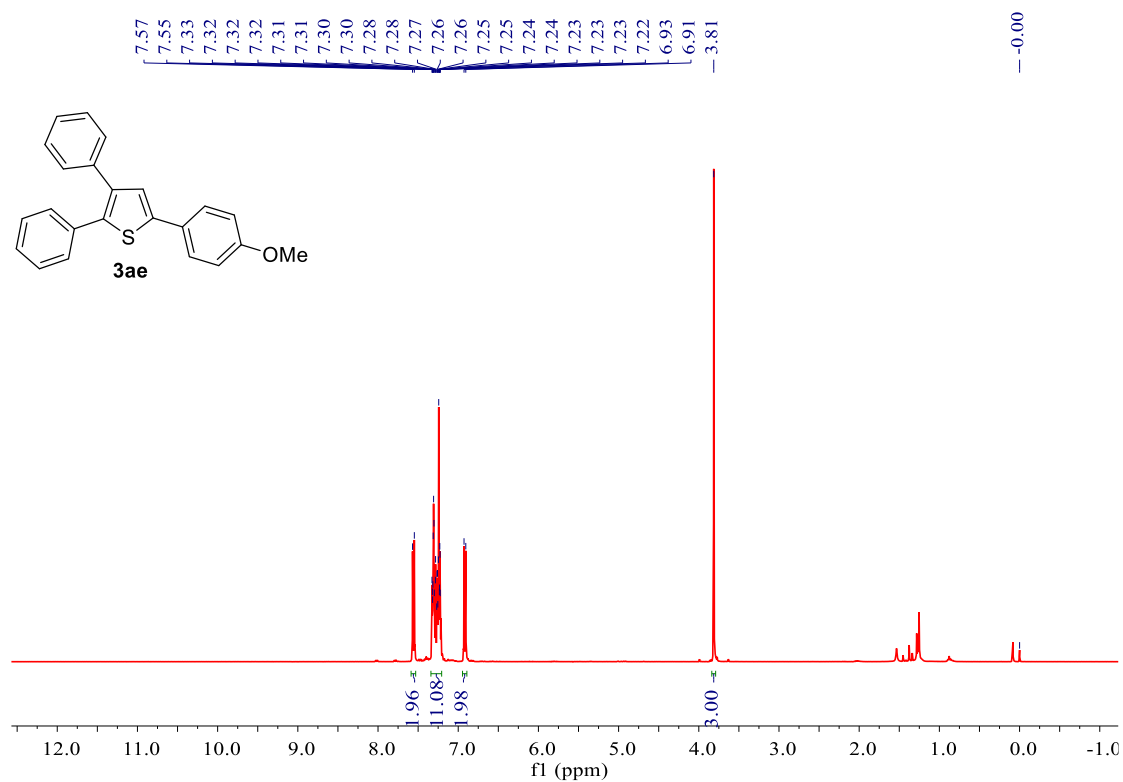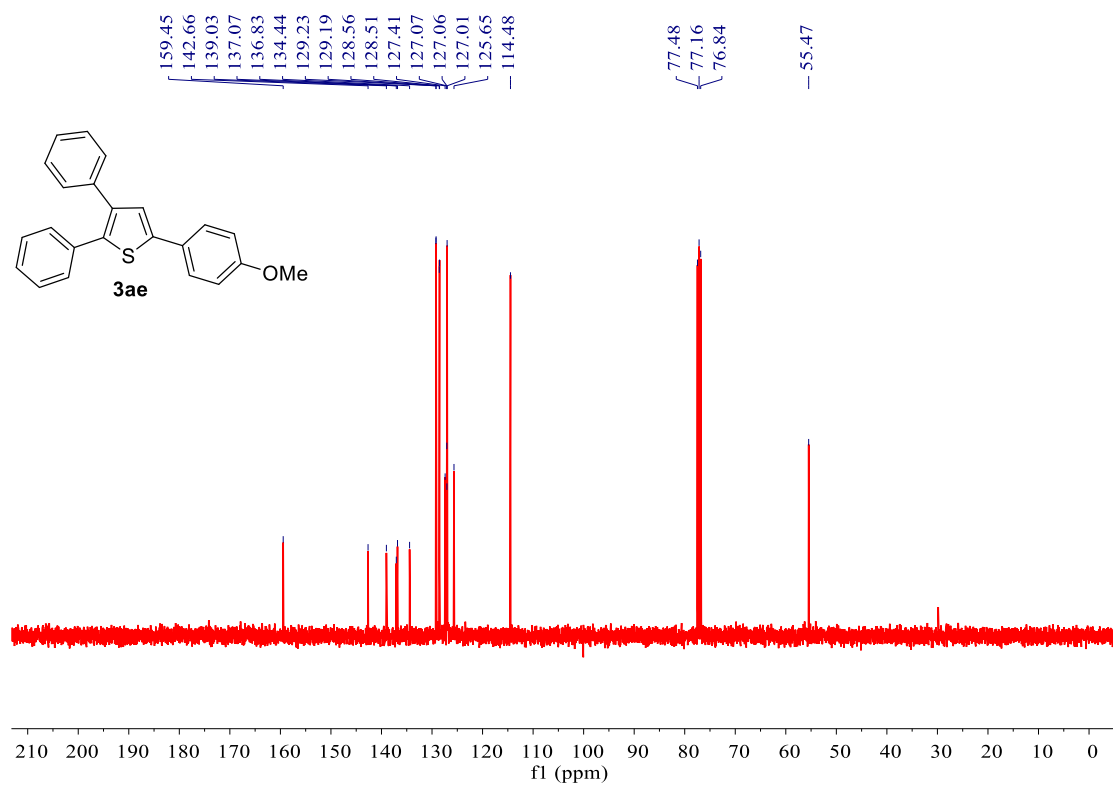

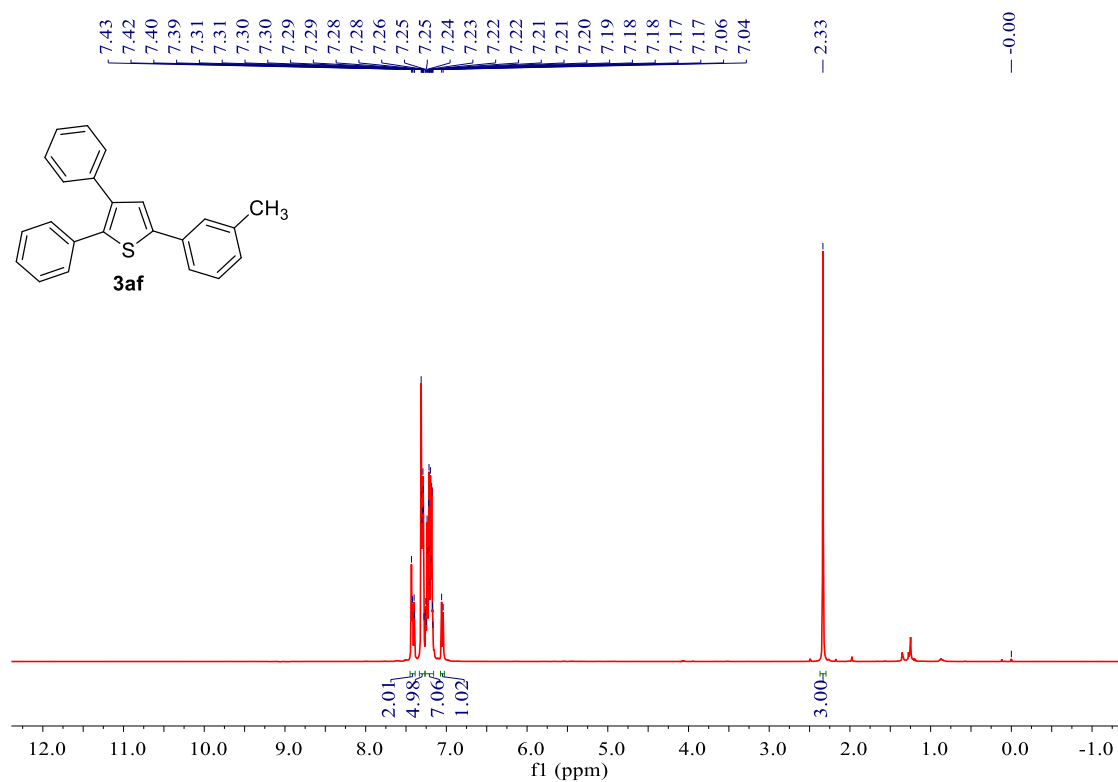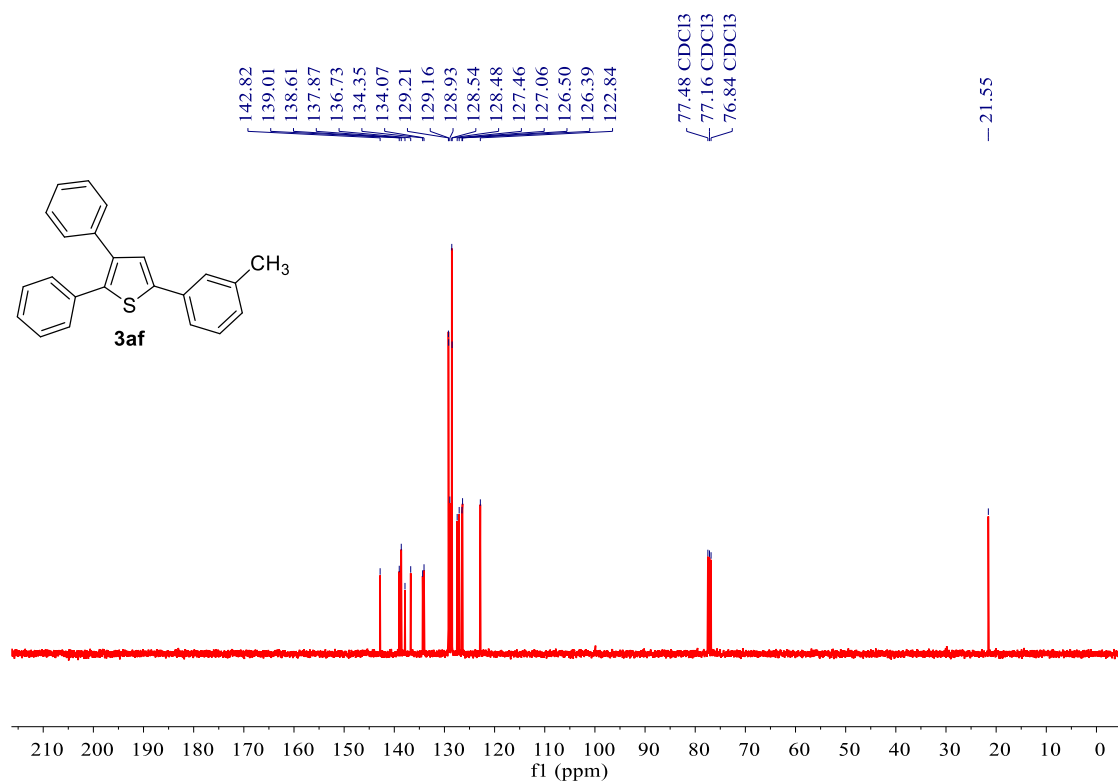

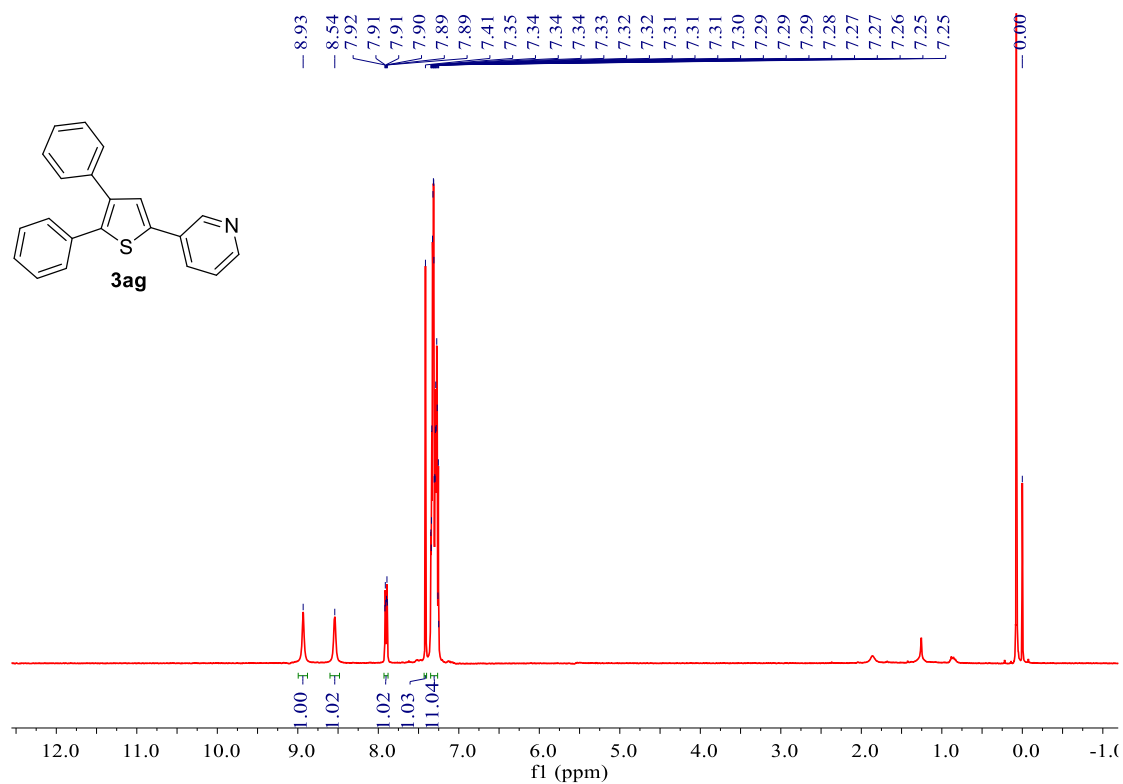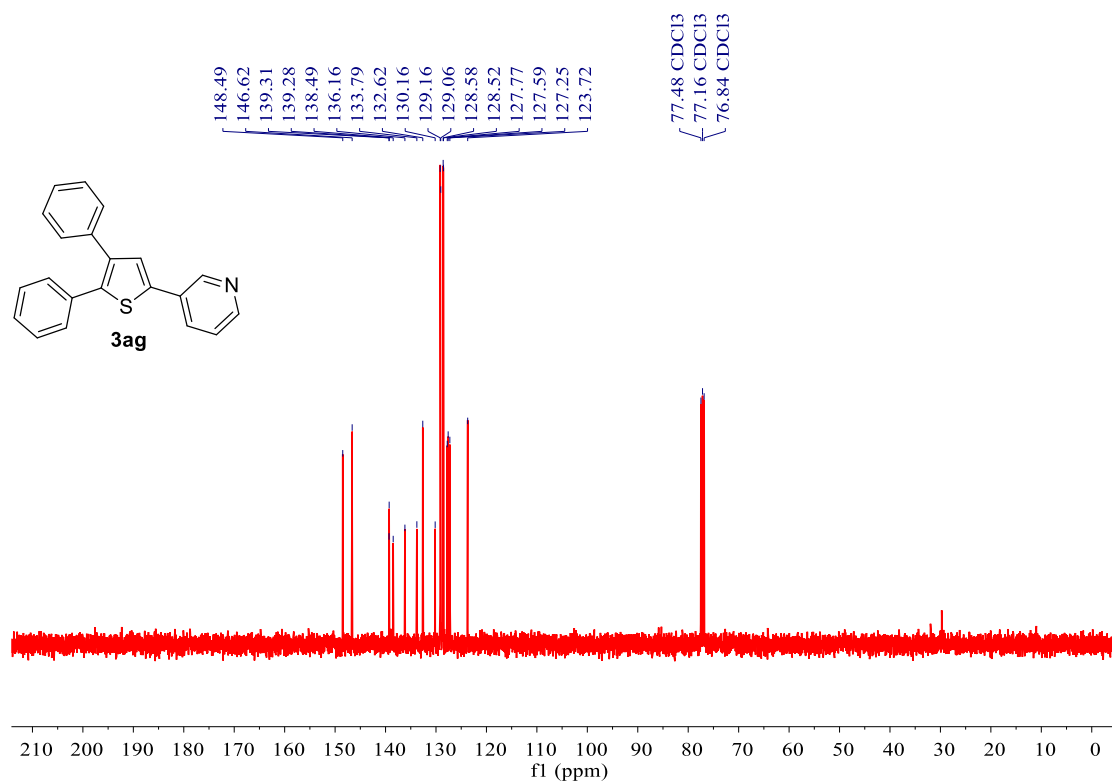

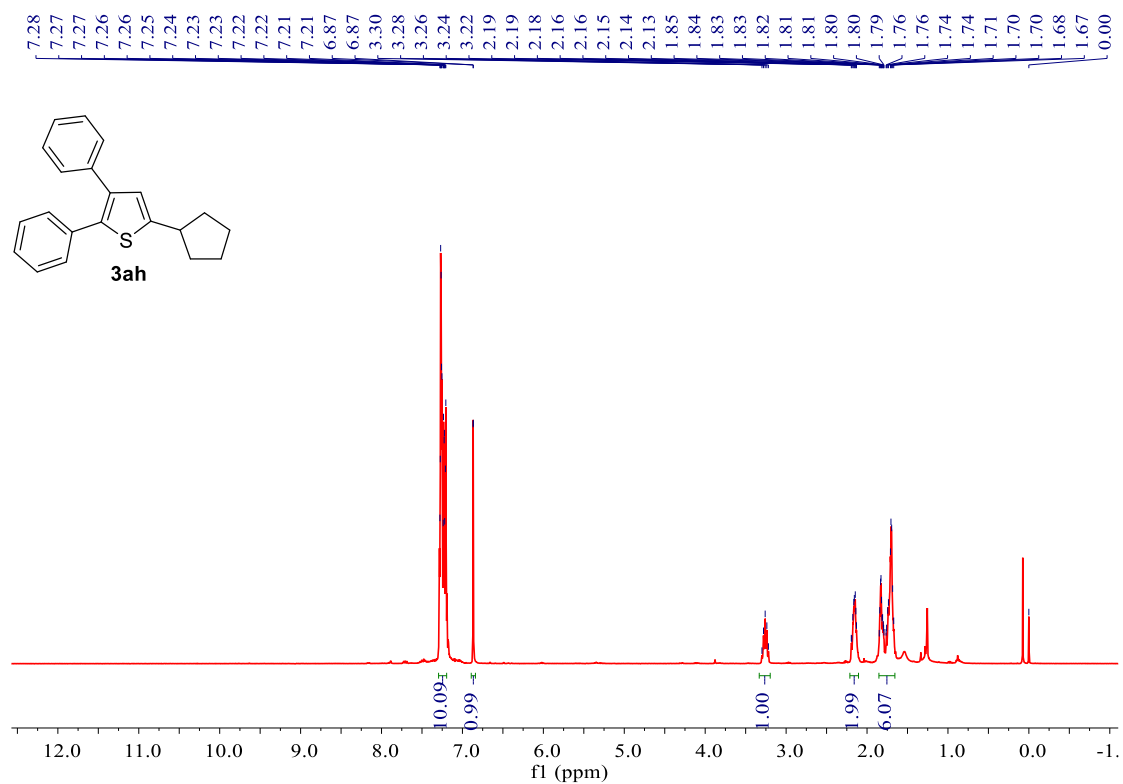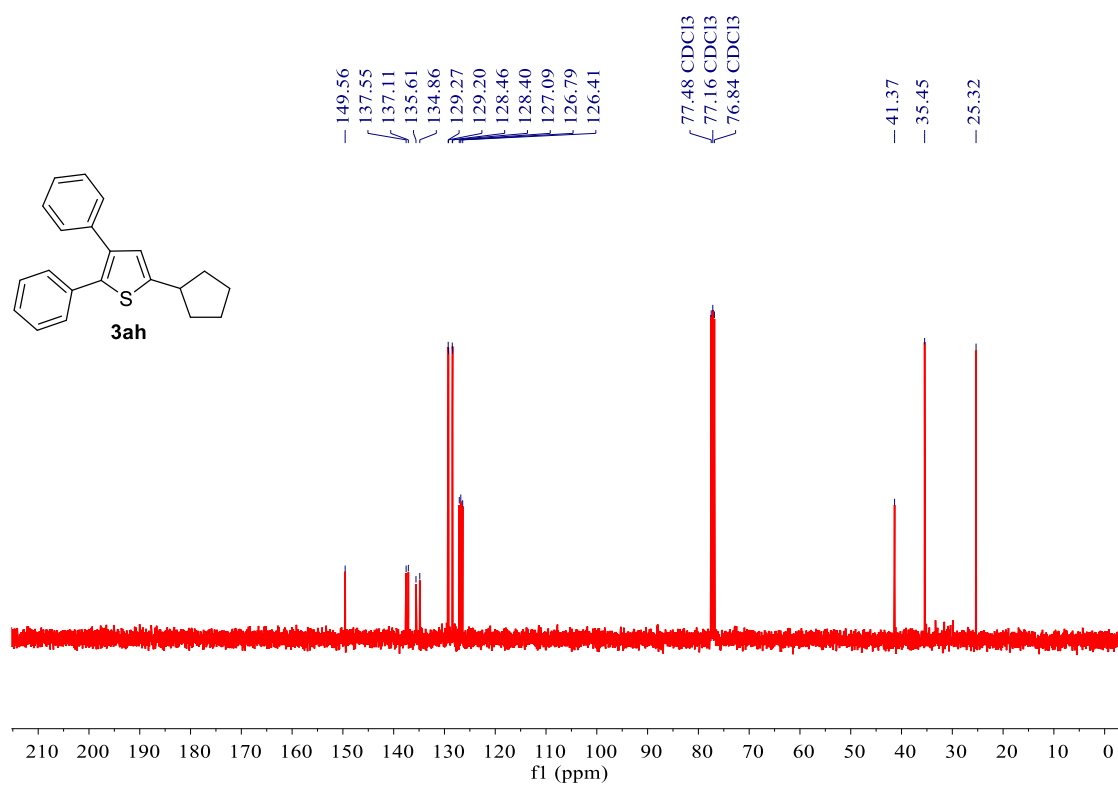

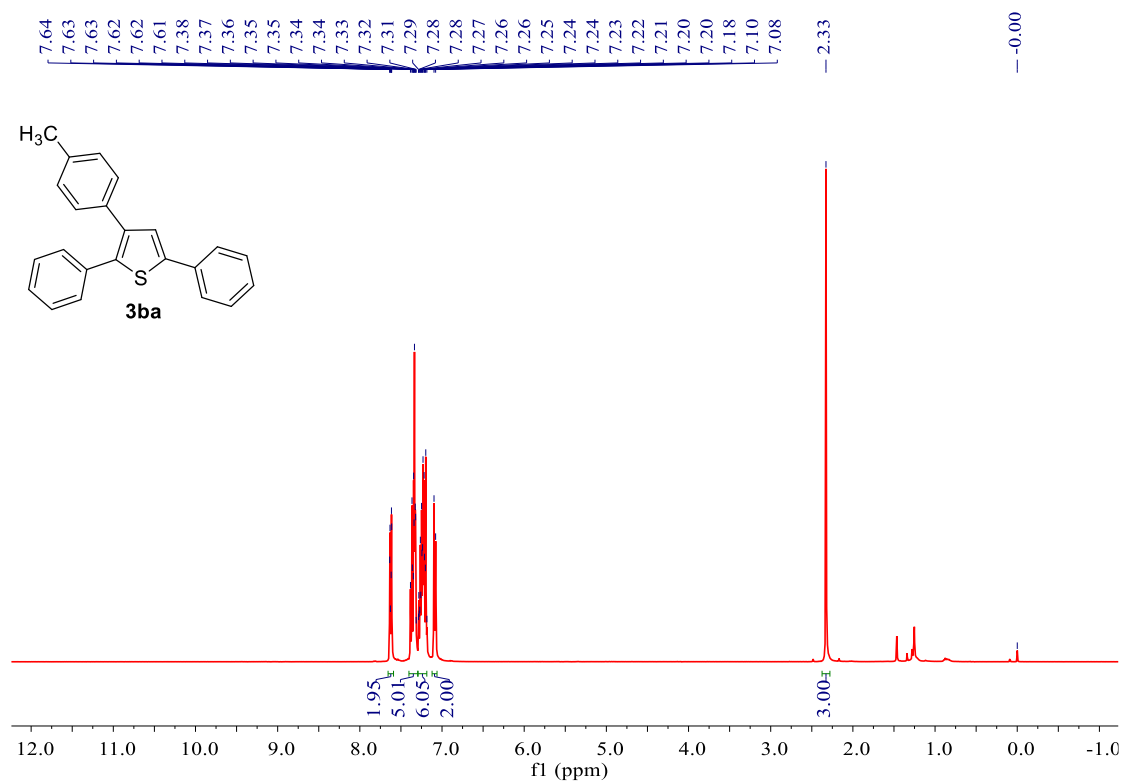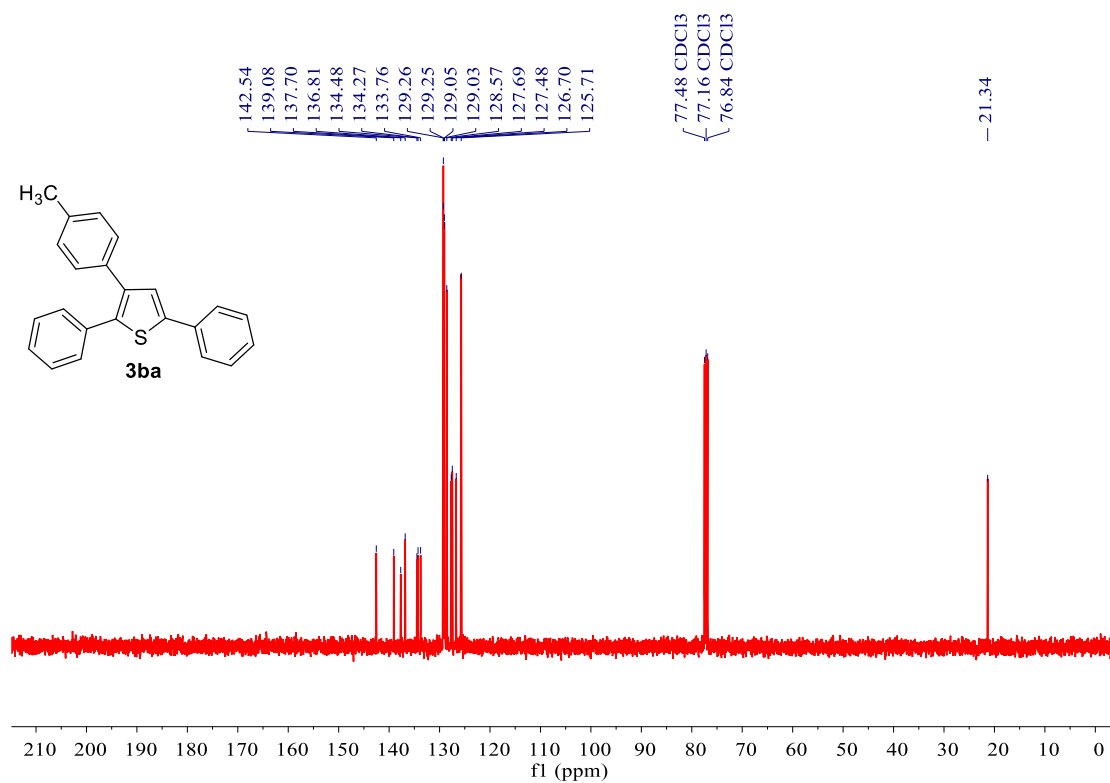

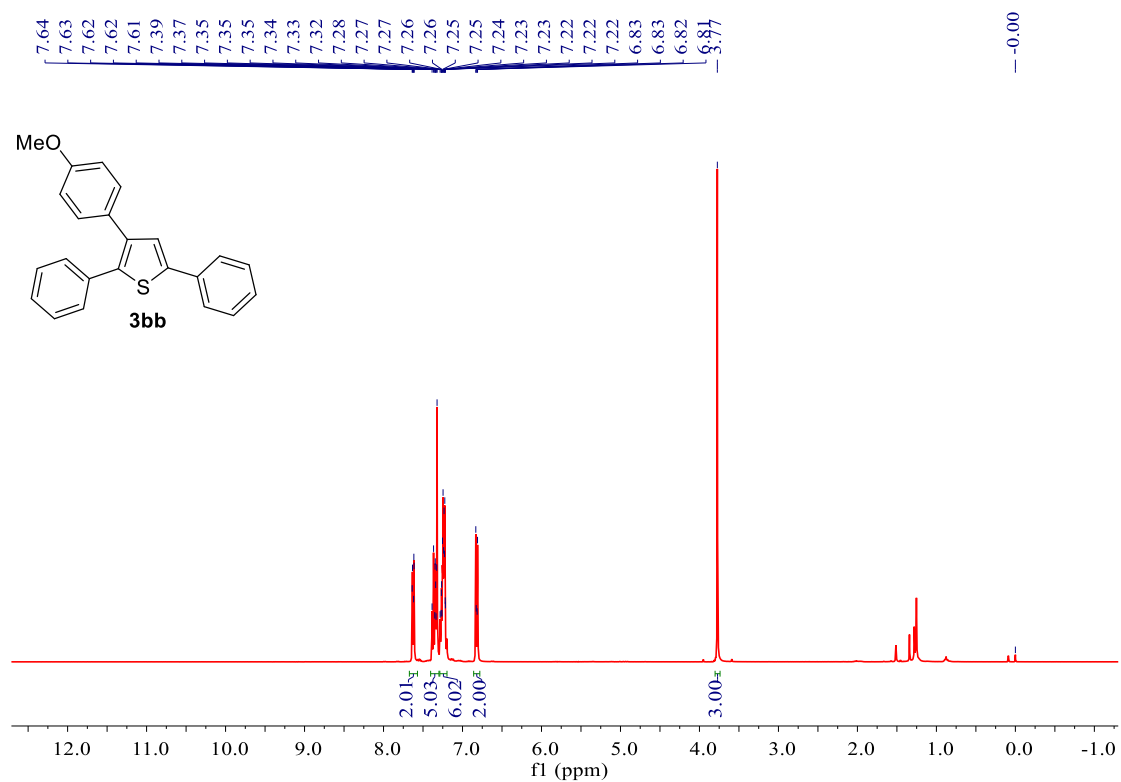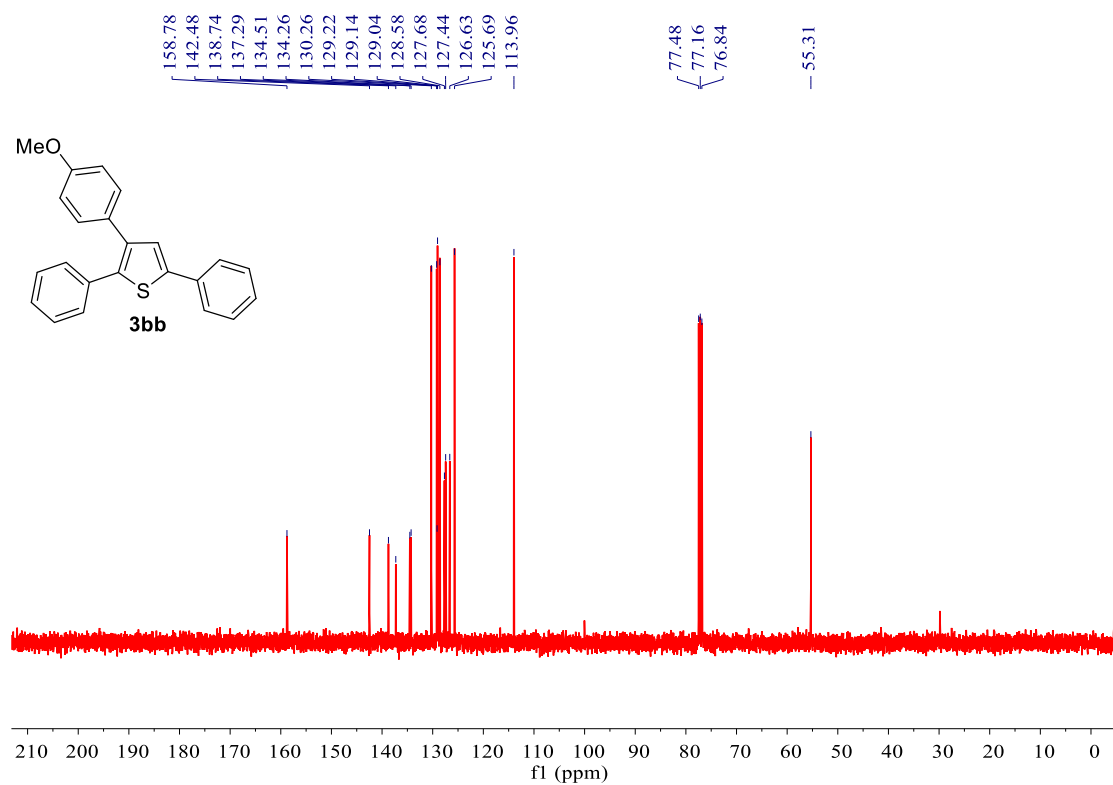

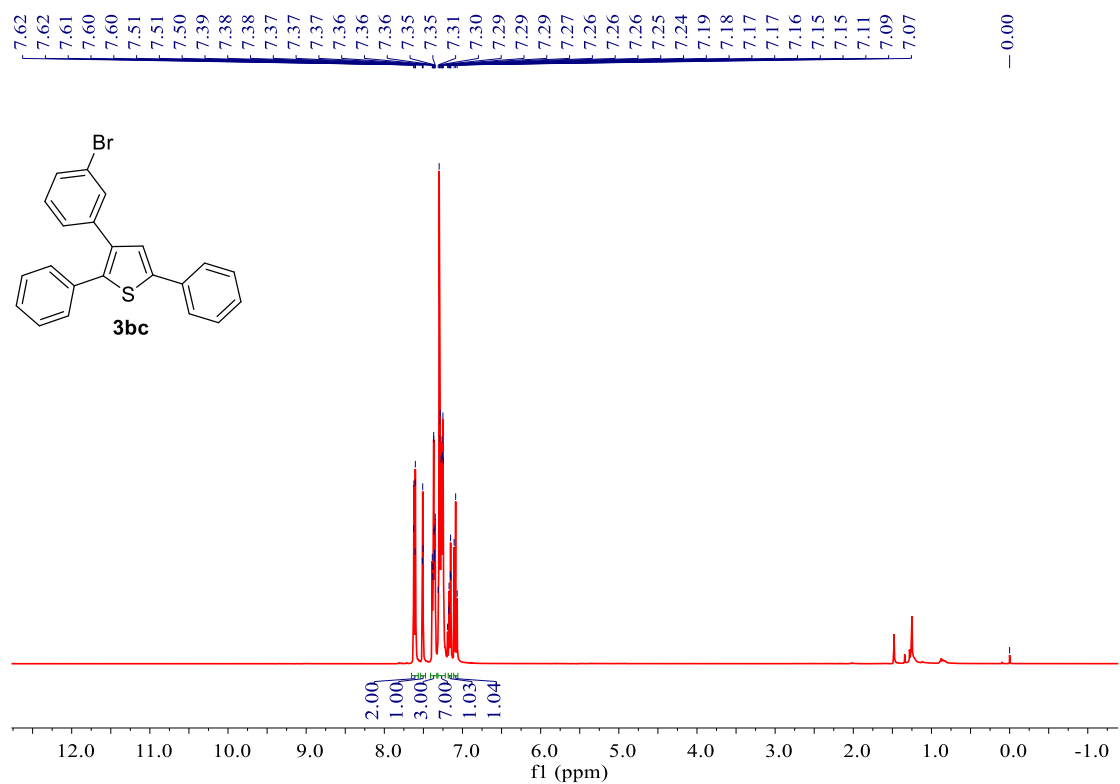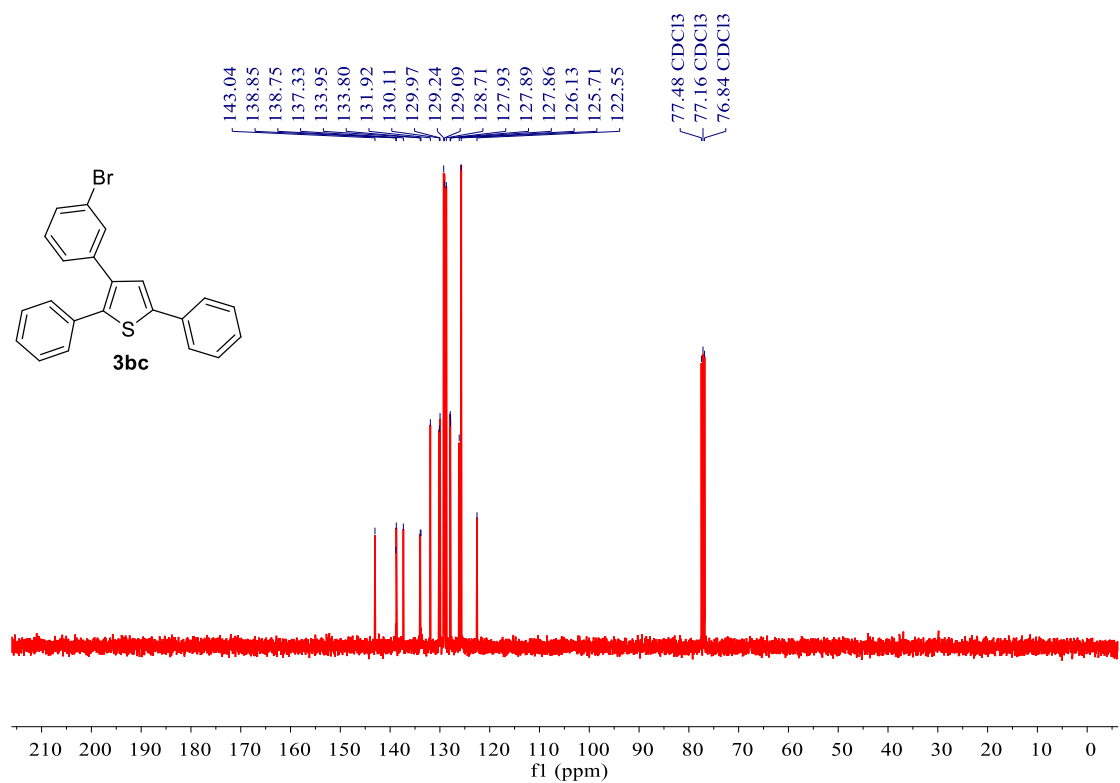

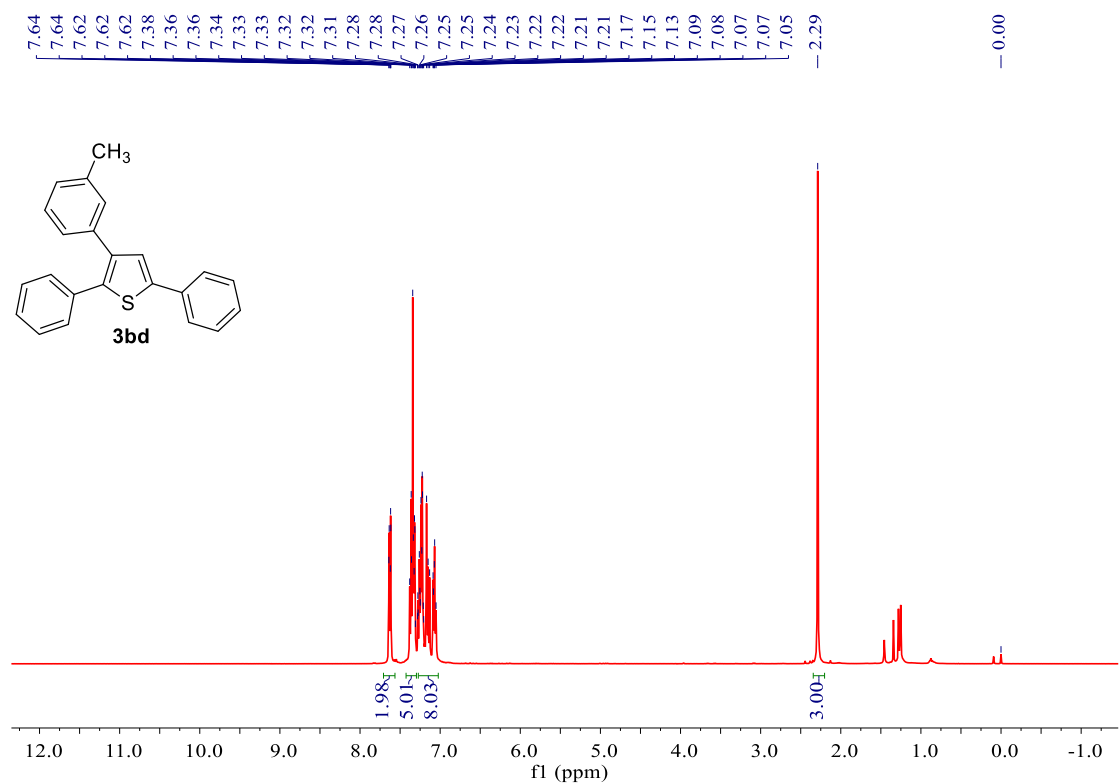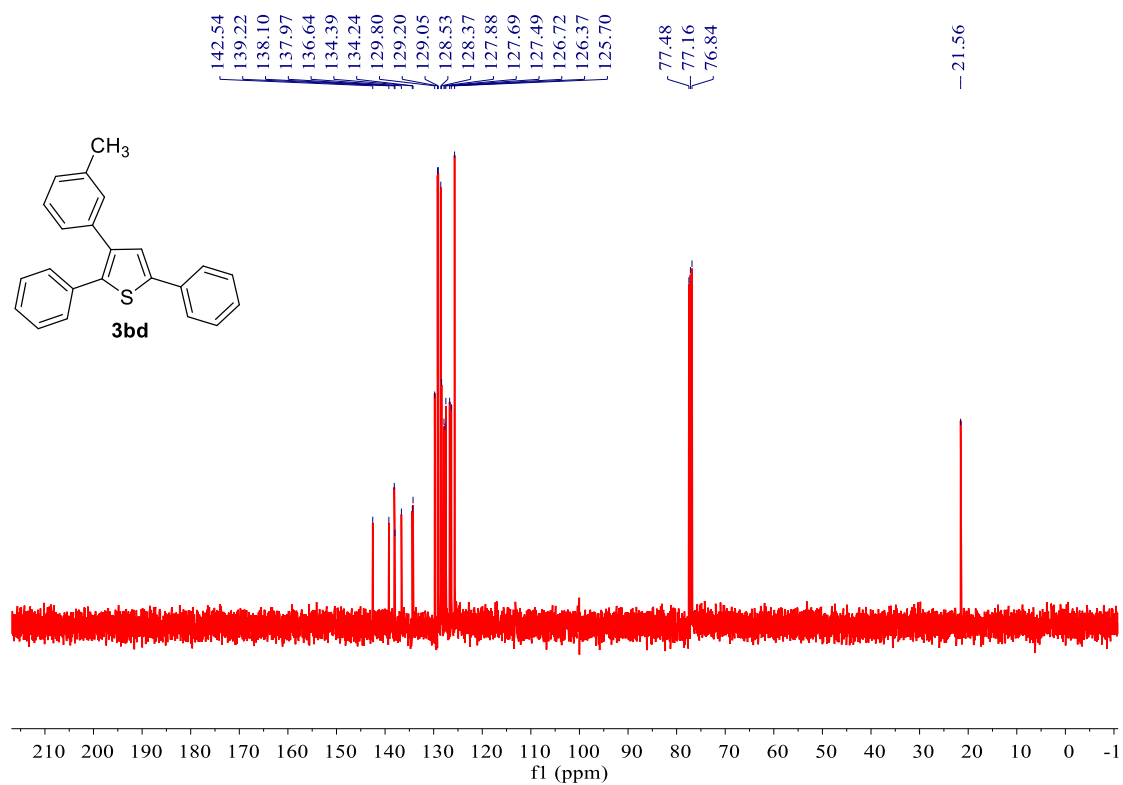

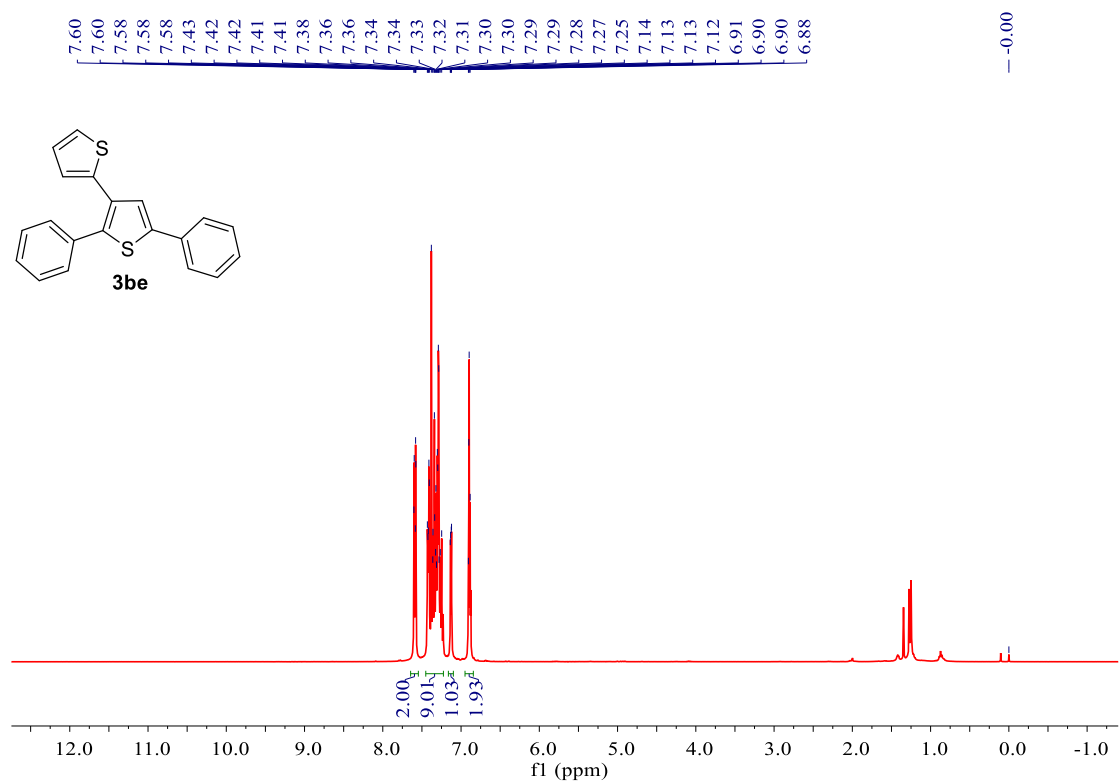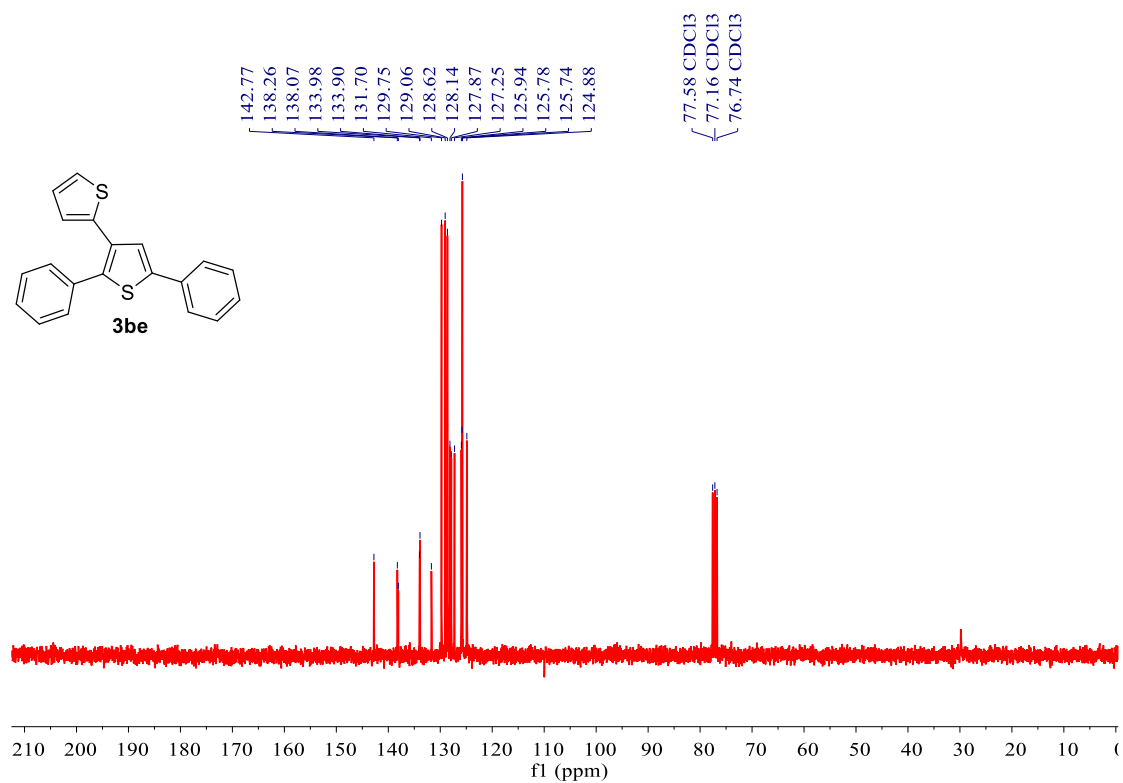

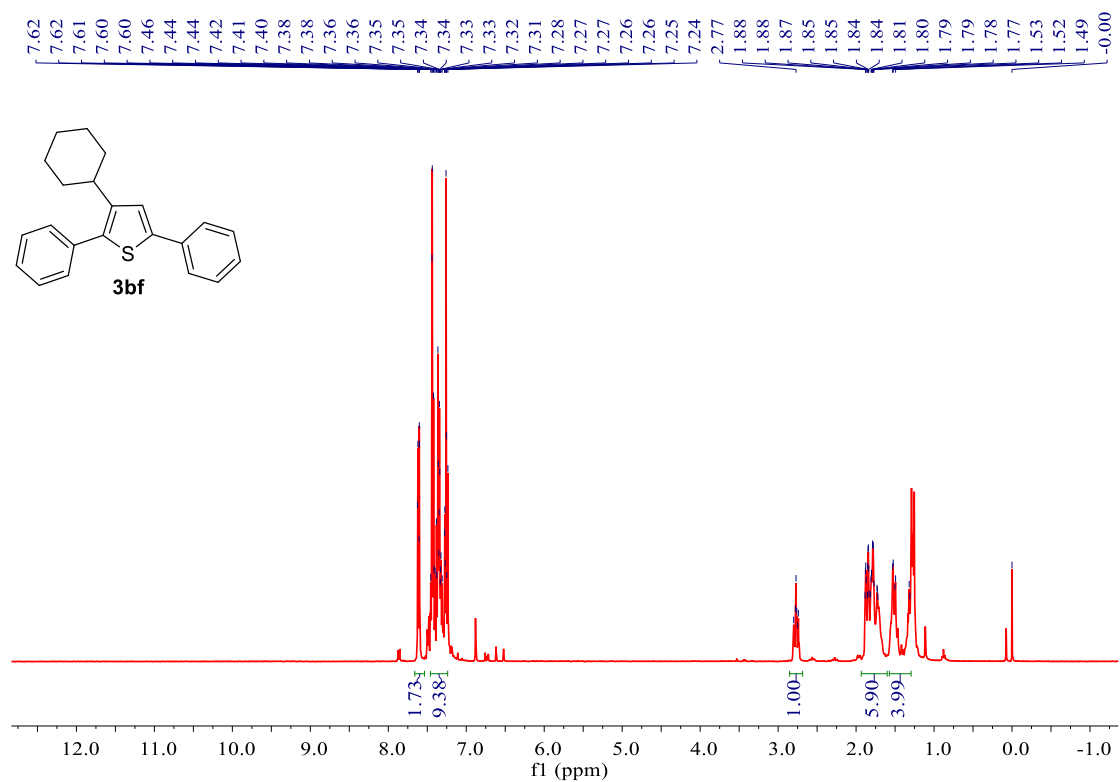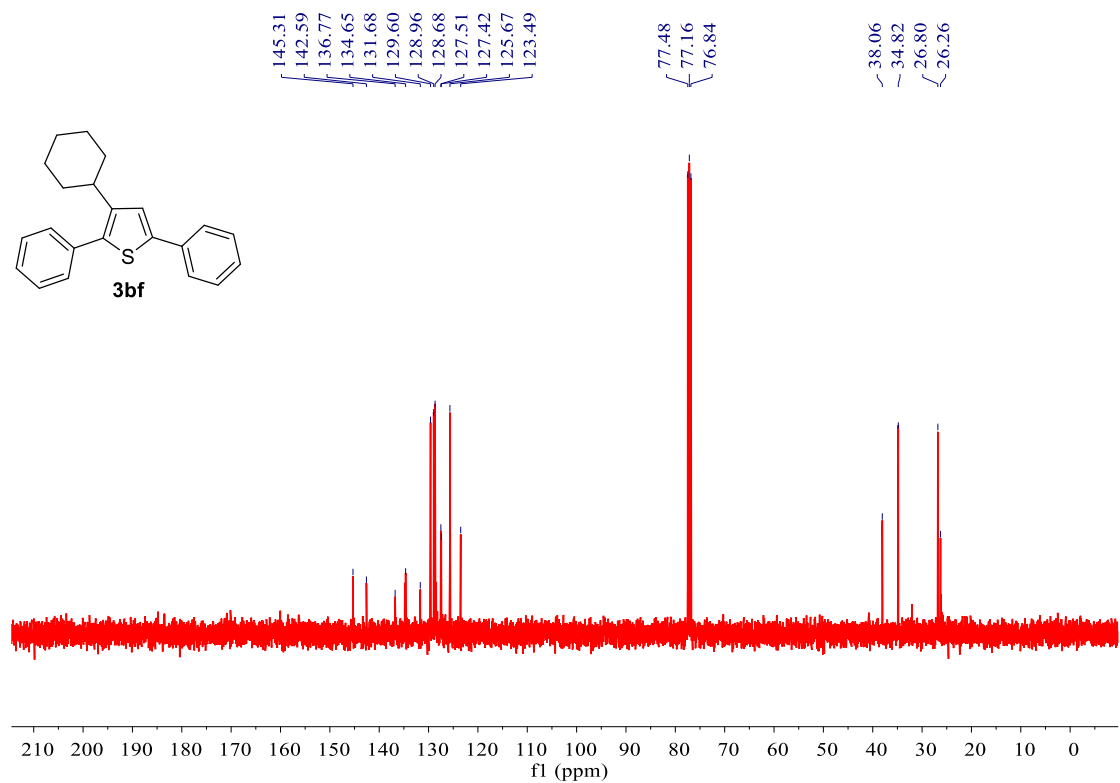

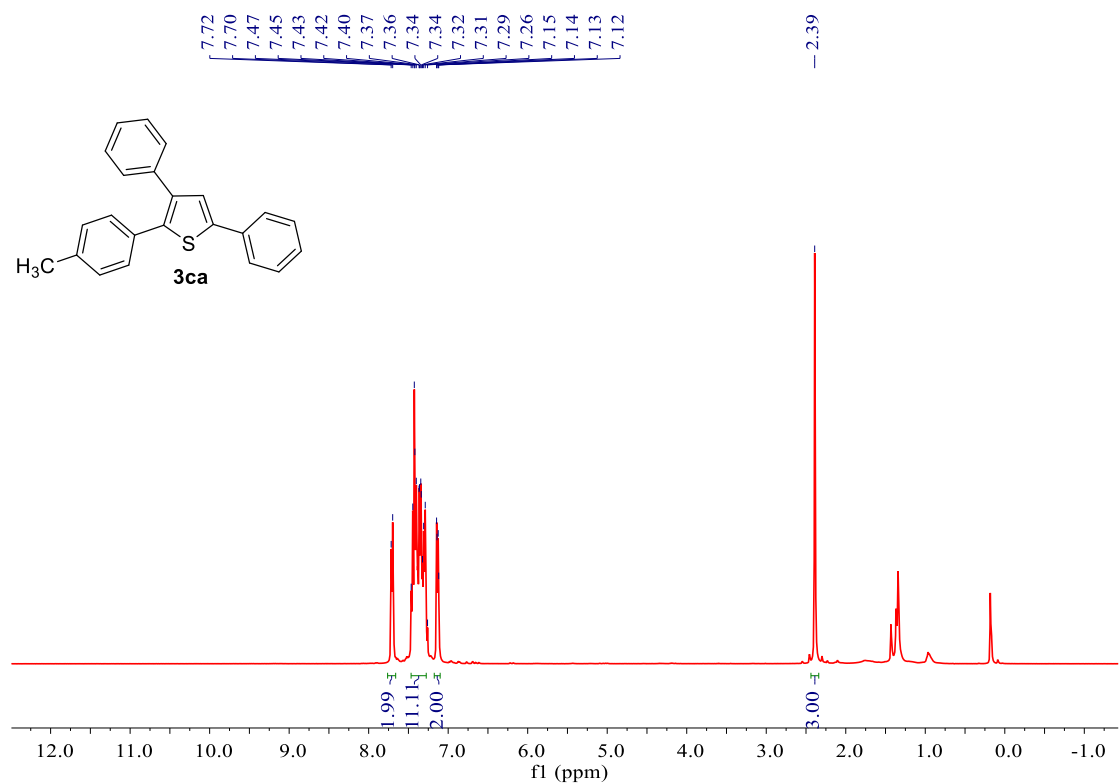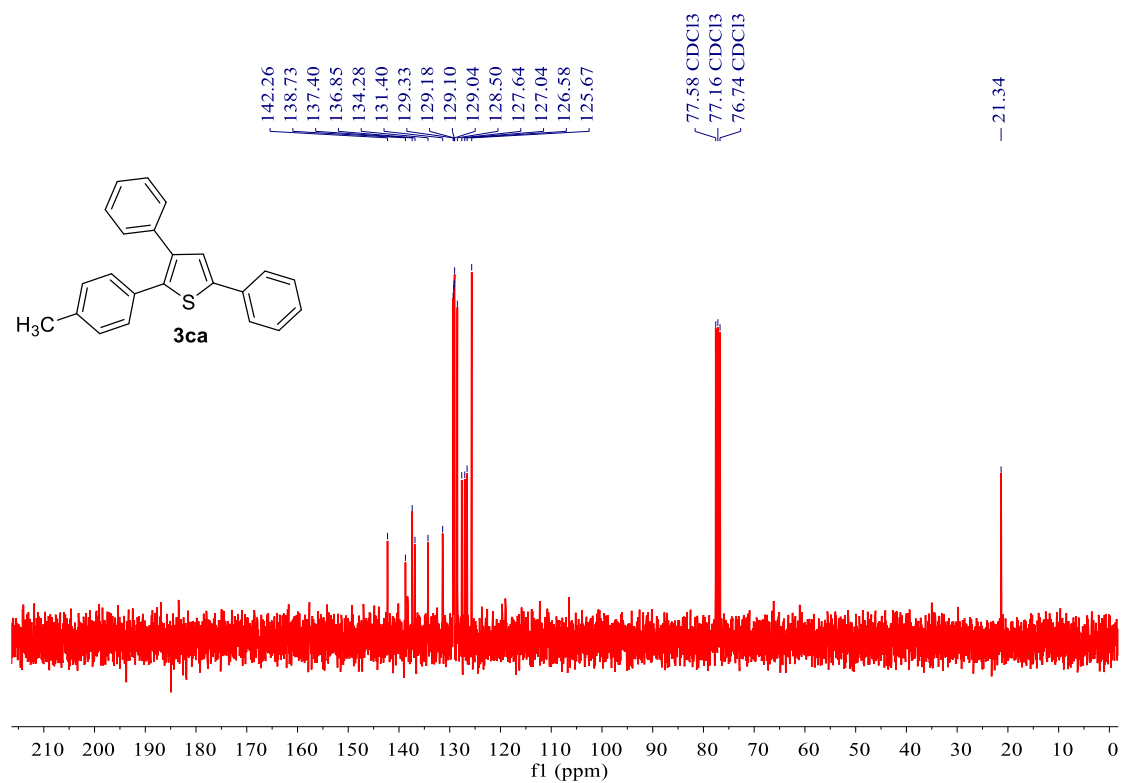

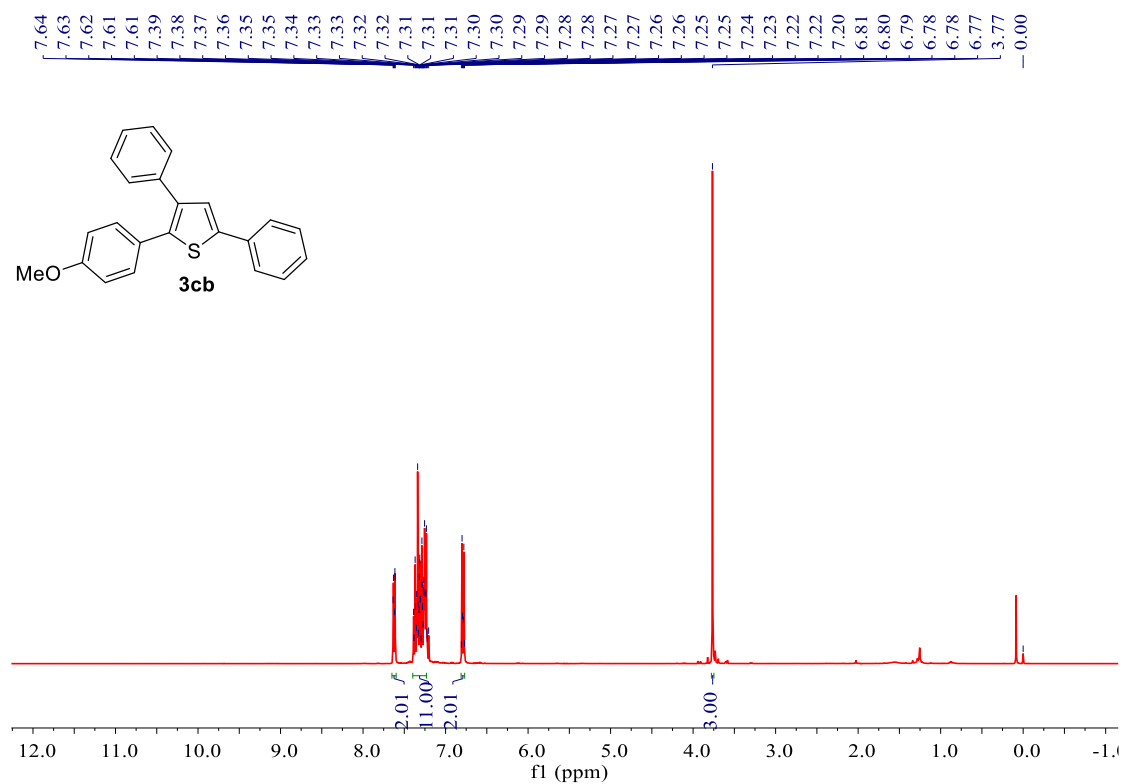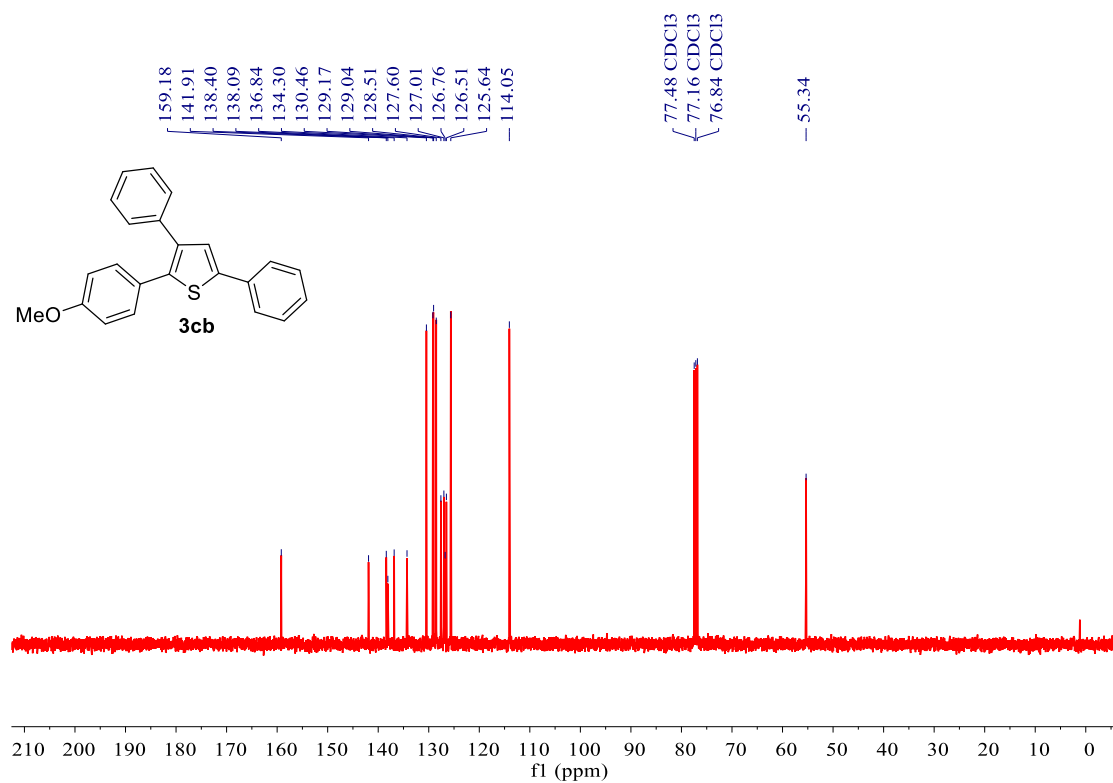

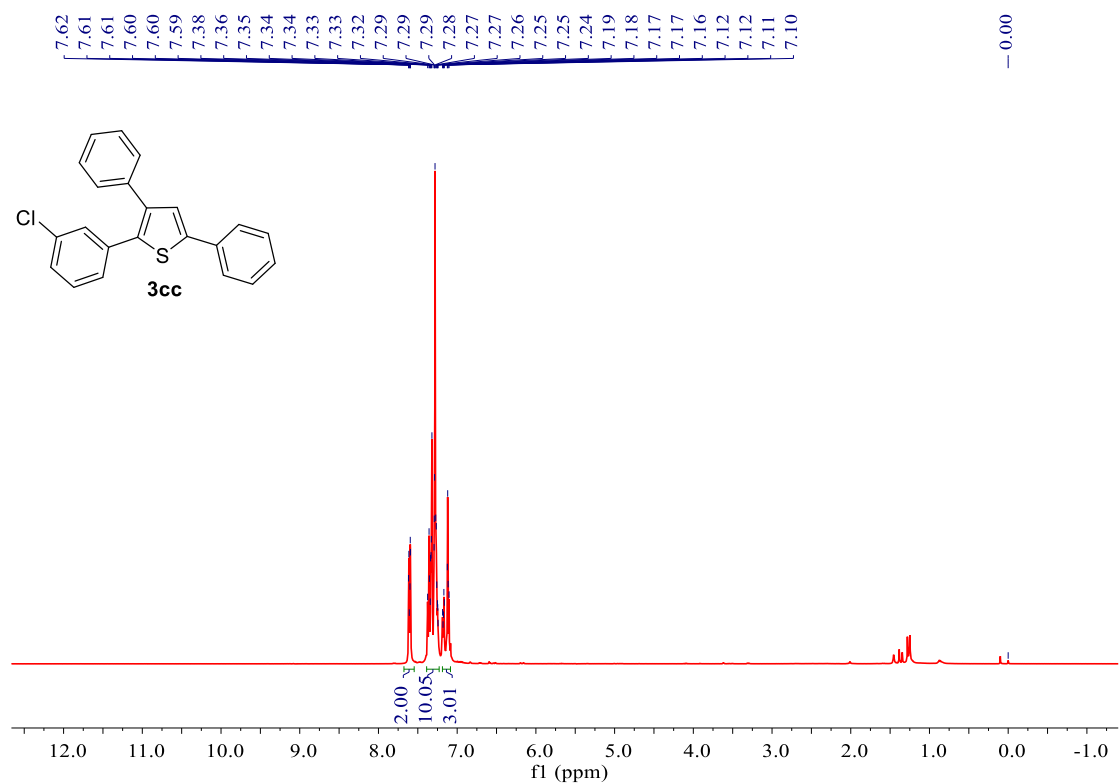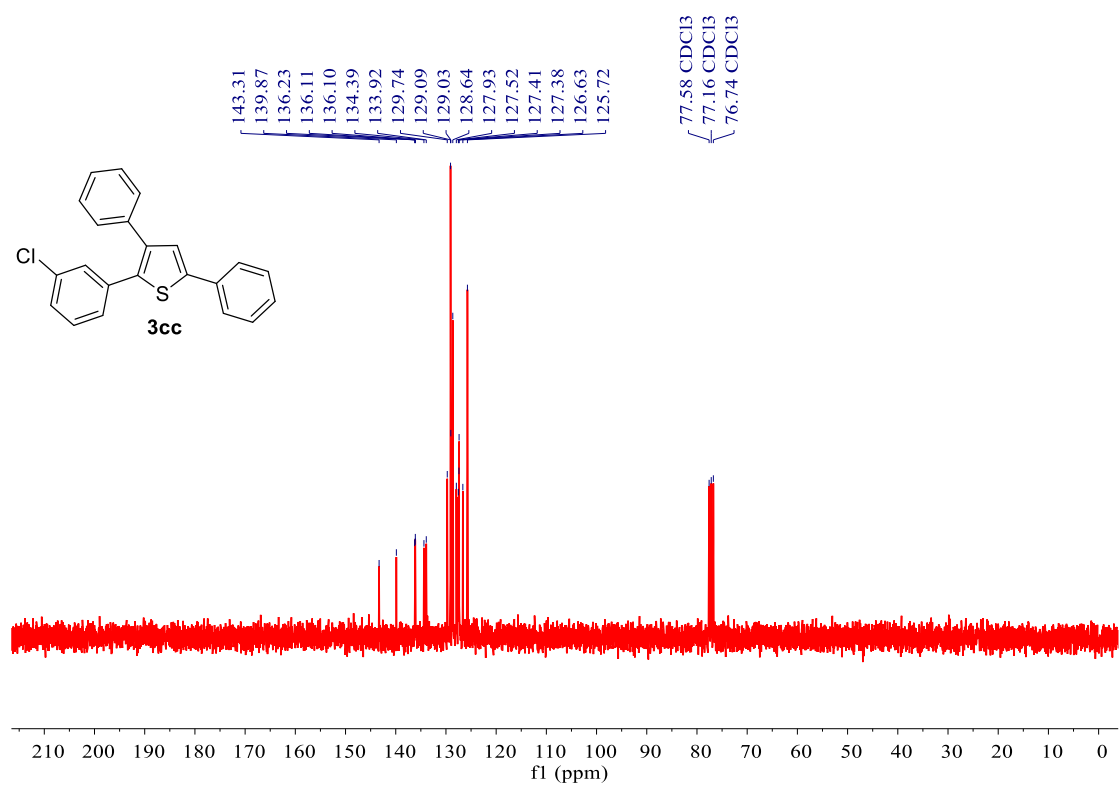

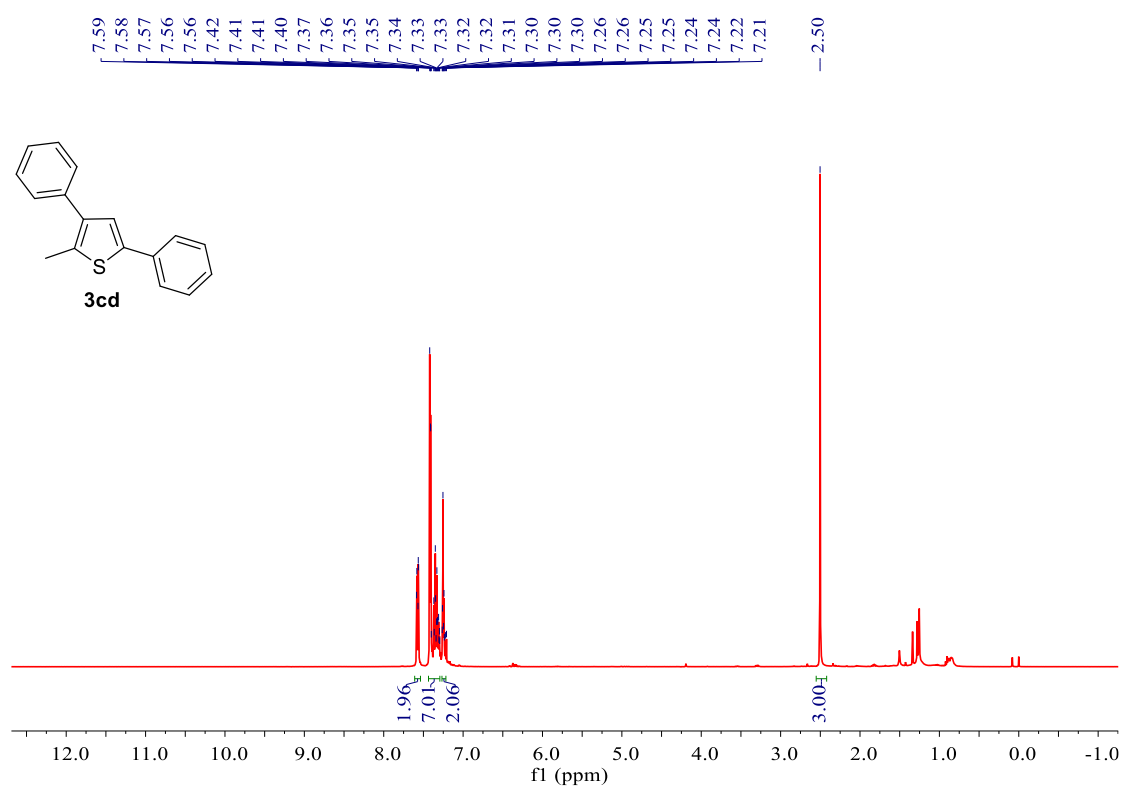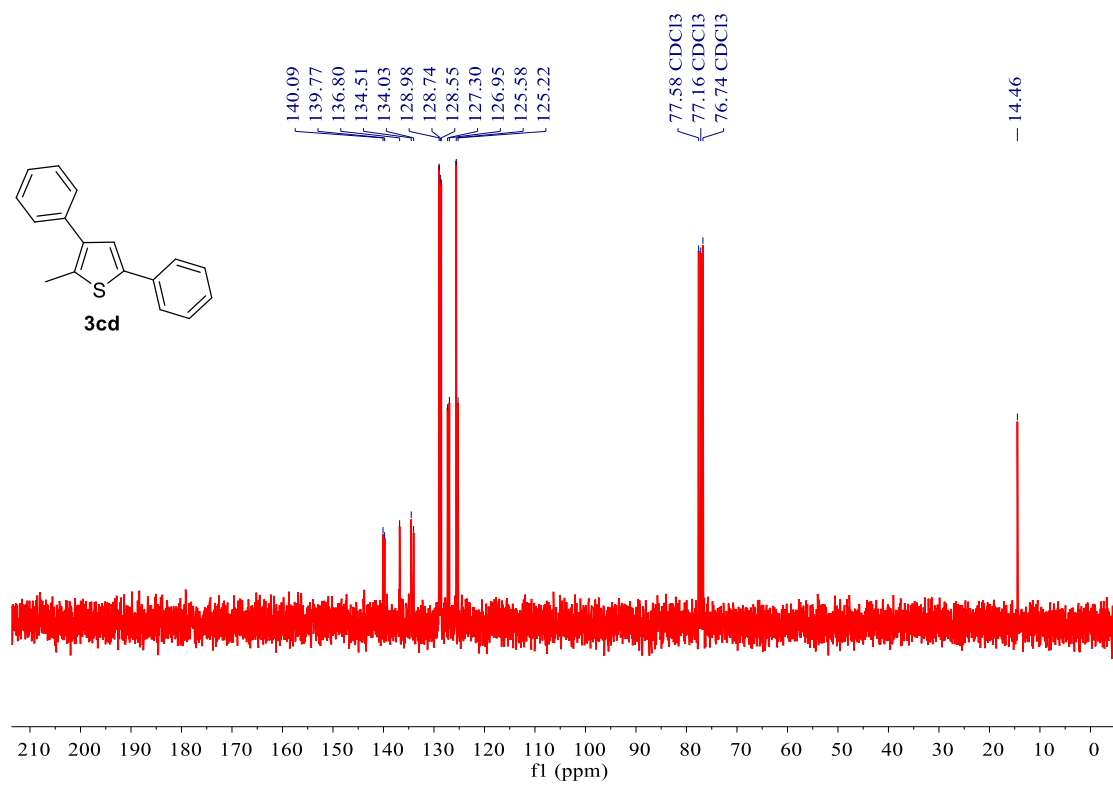

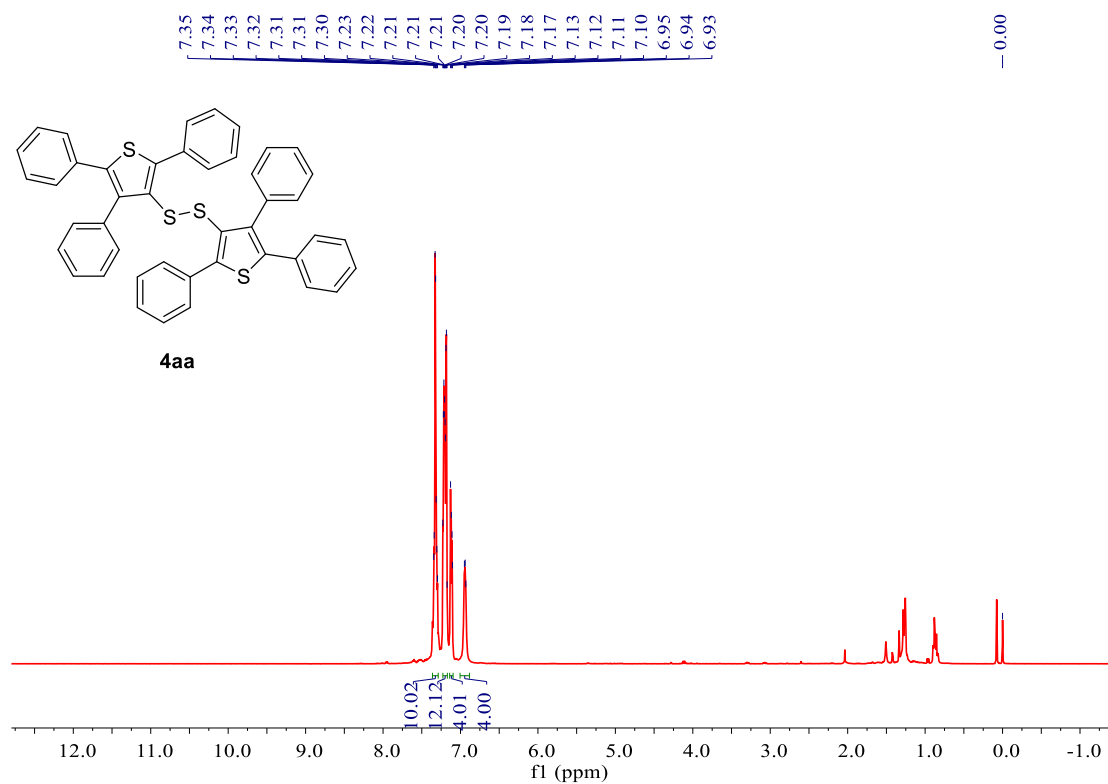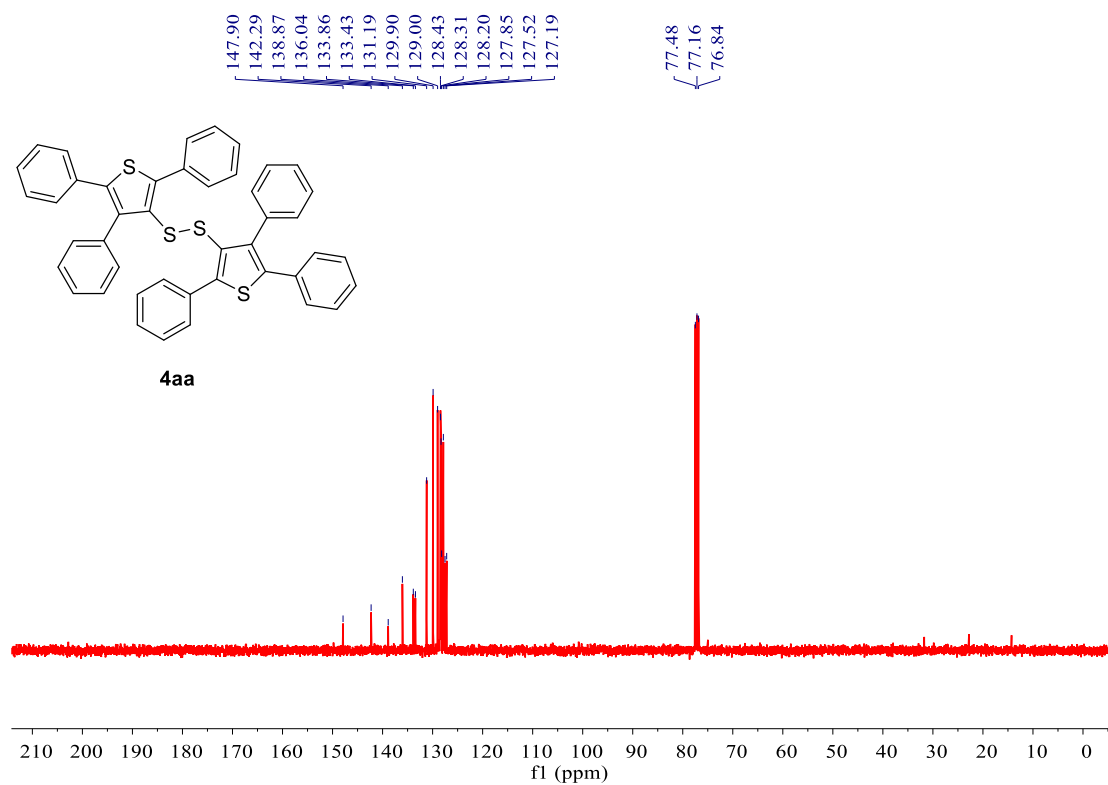

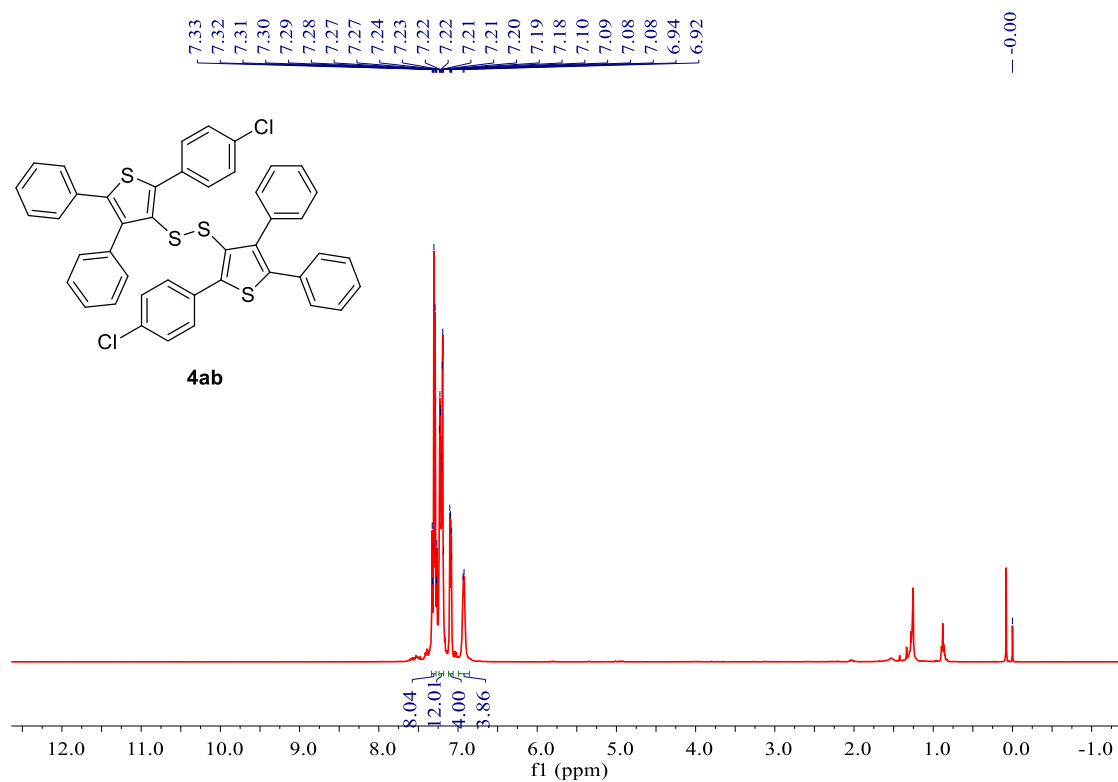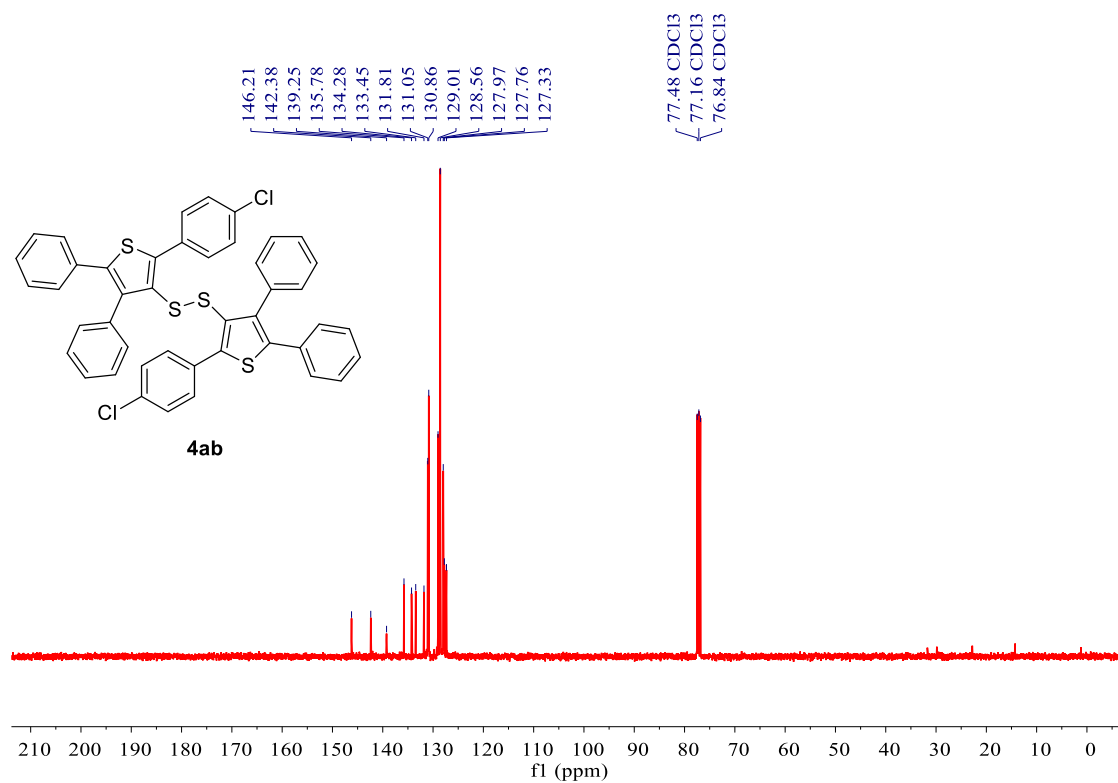

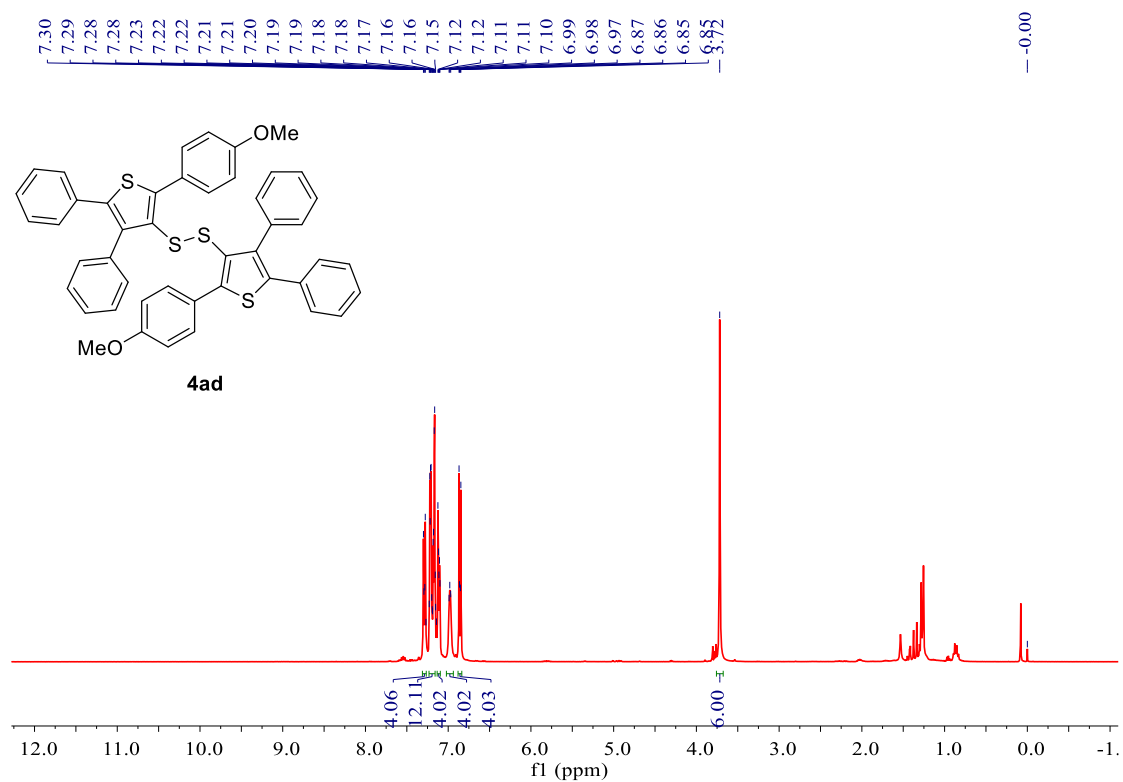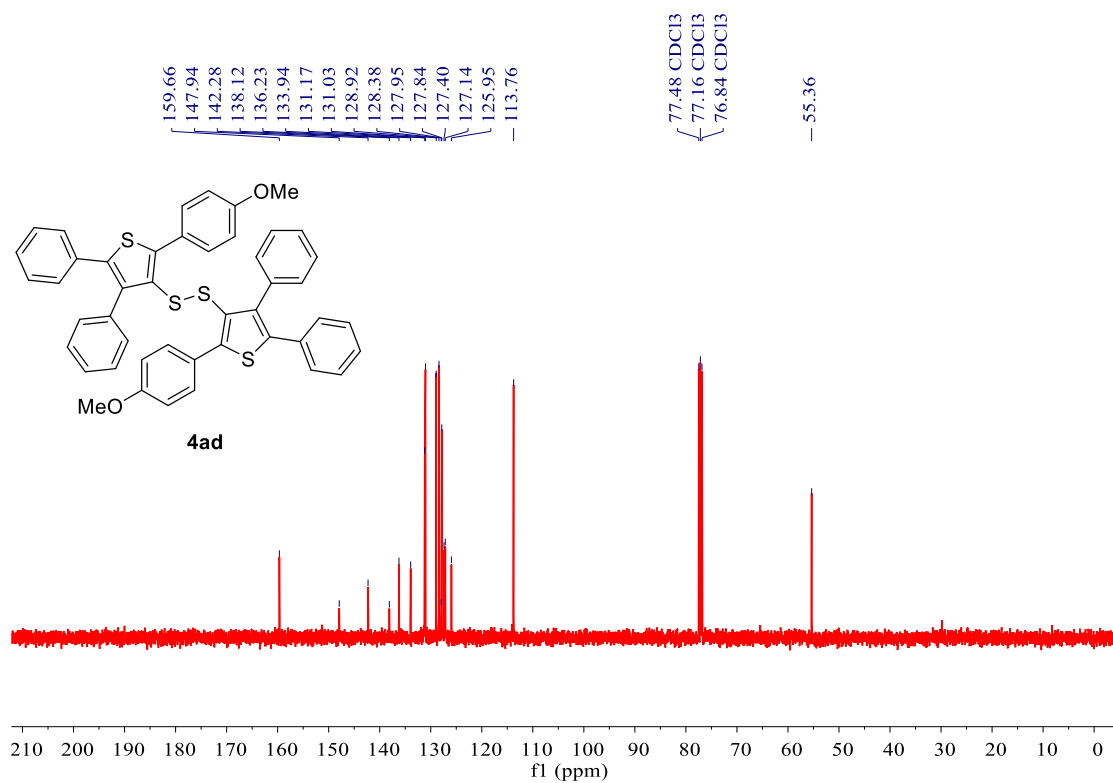

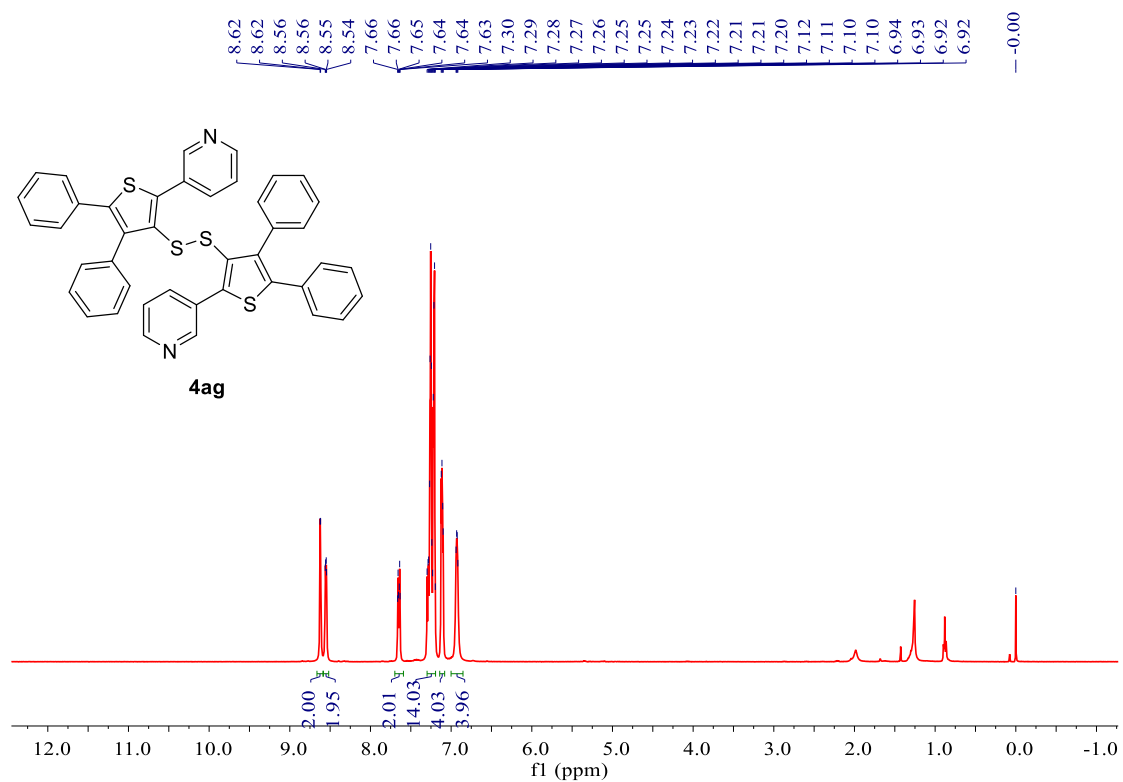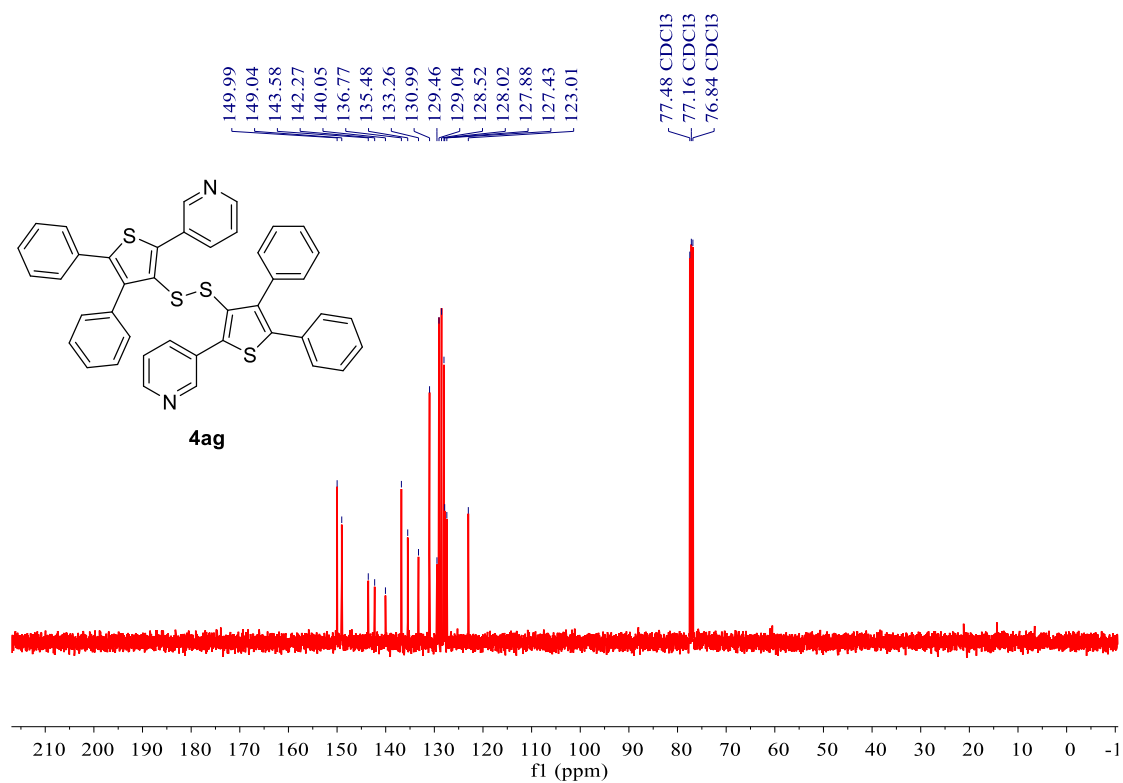

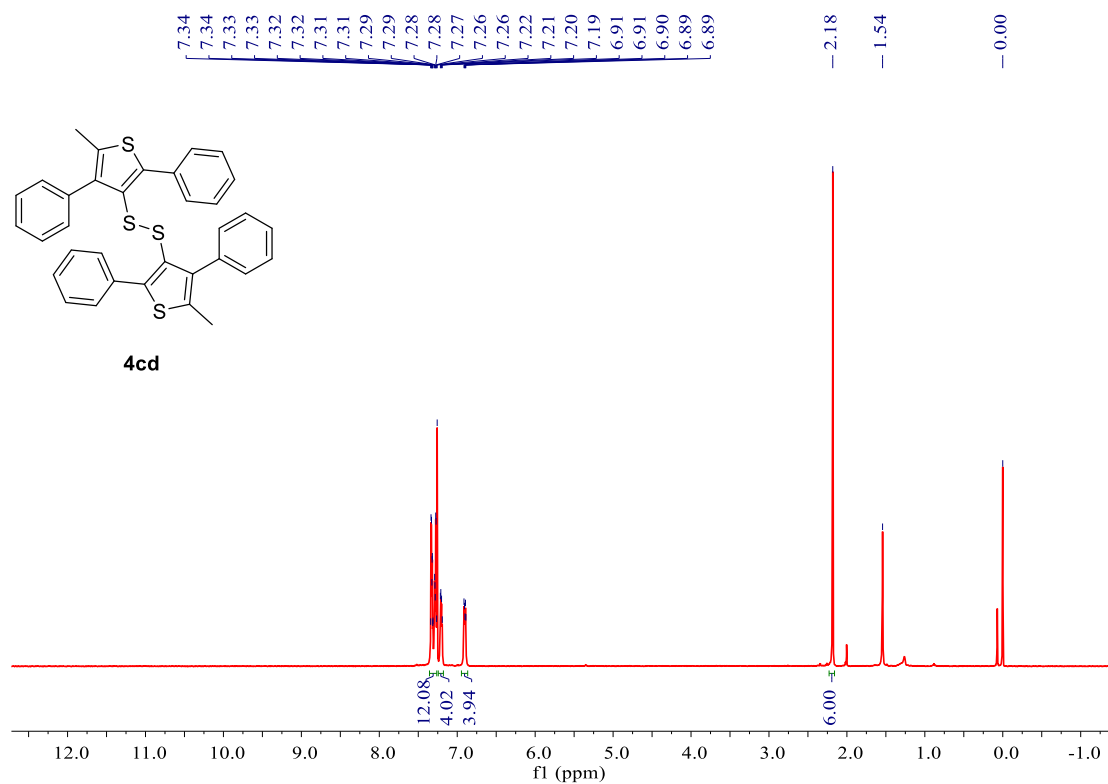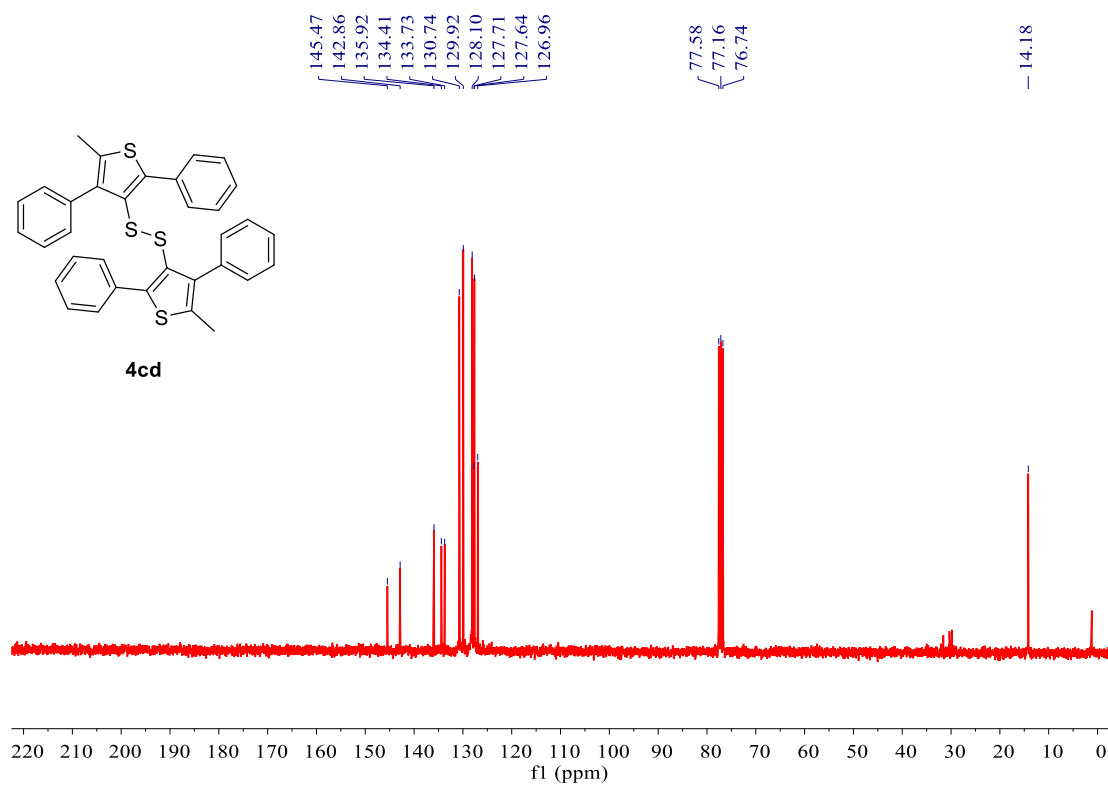

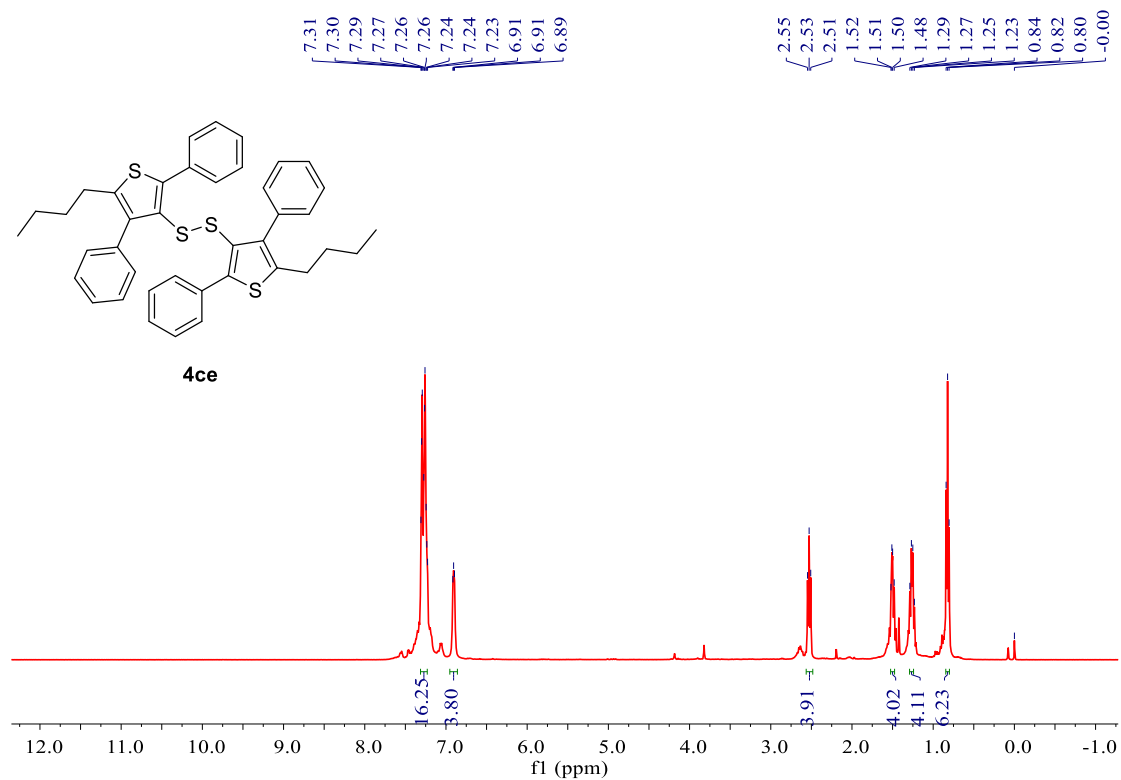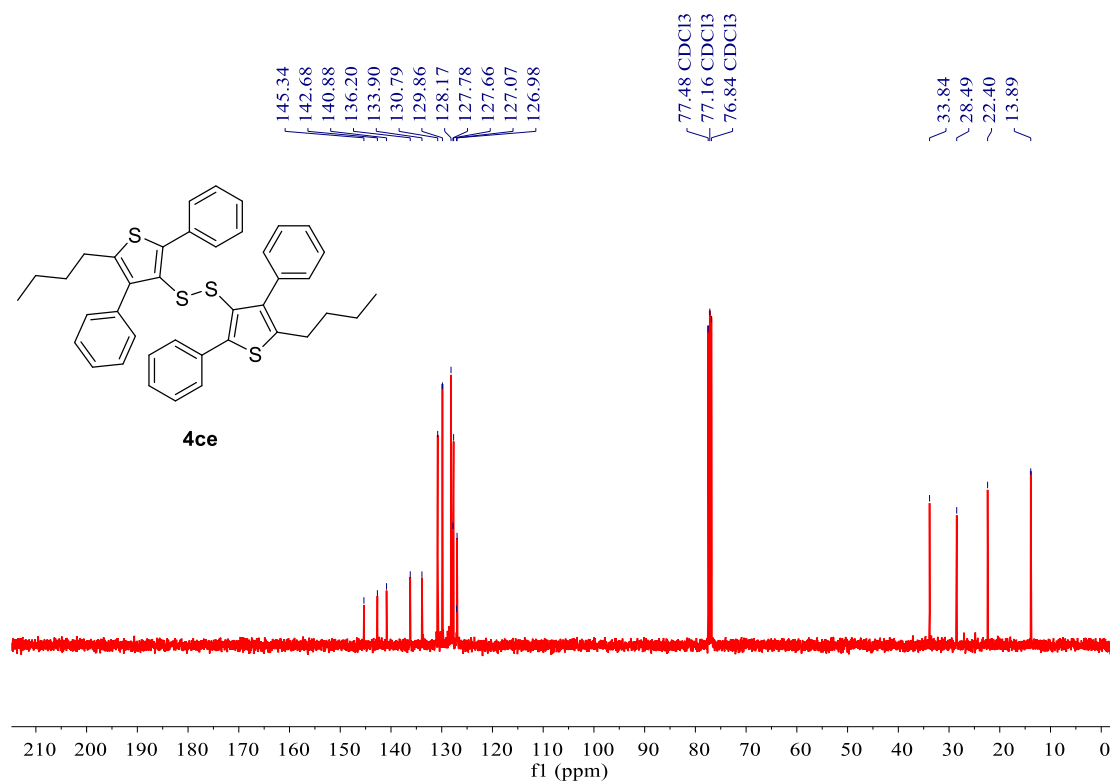

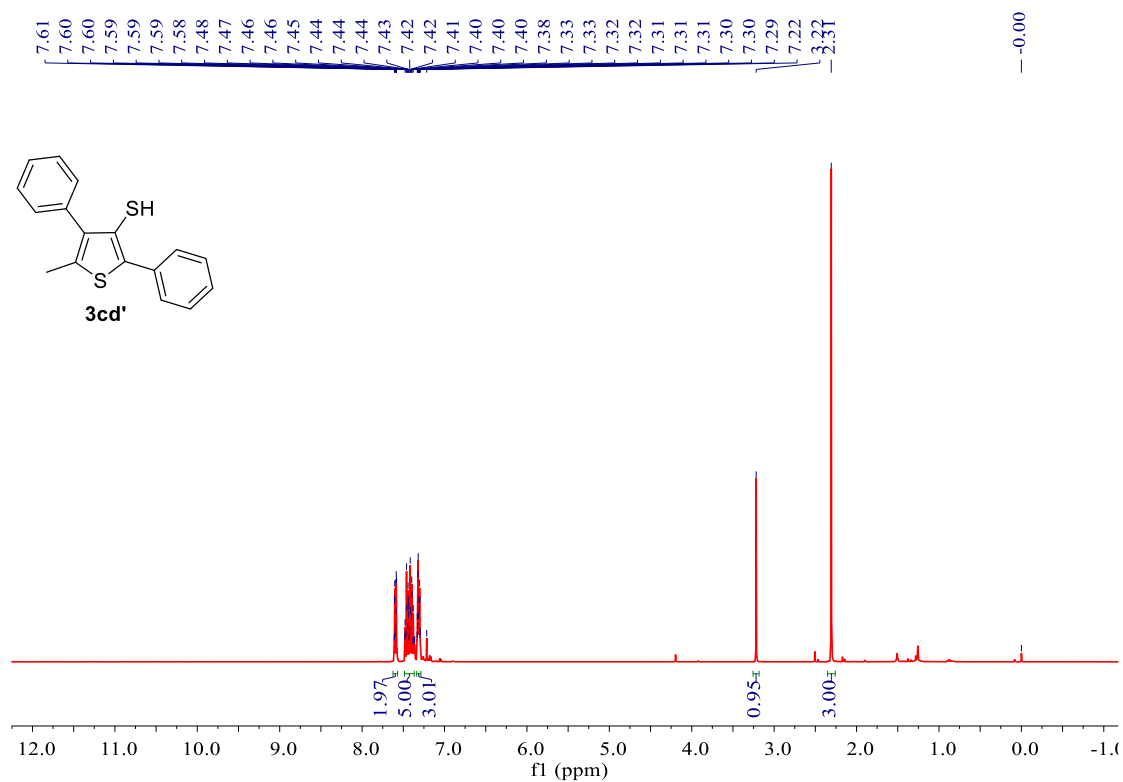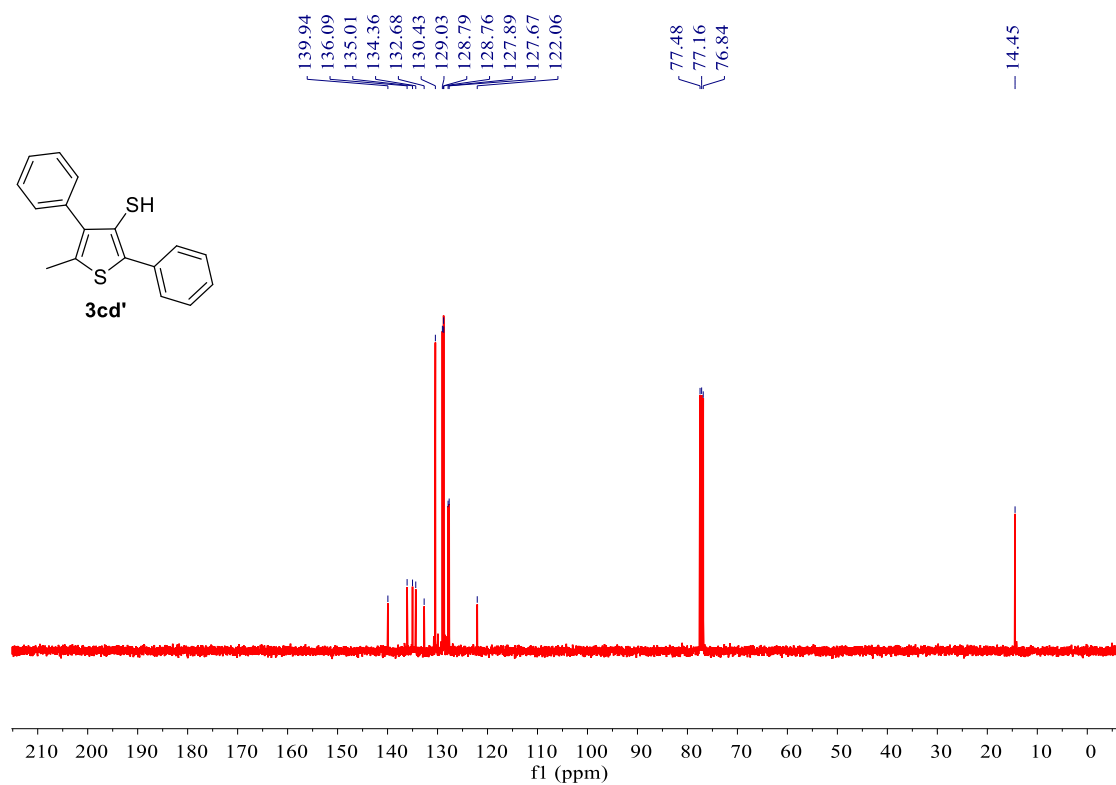

## 10. X-ray Structure of 4aa

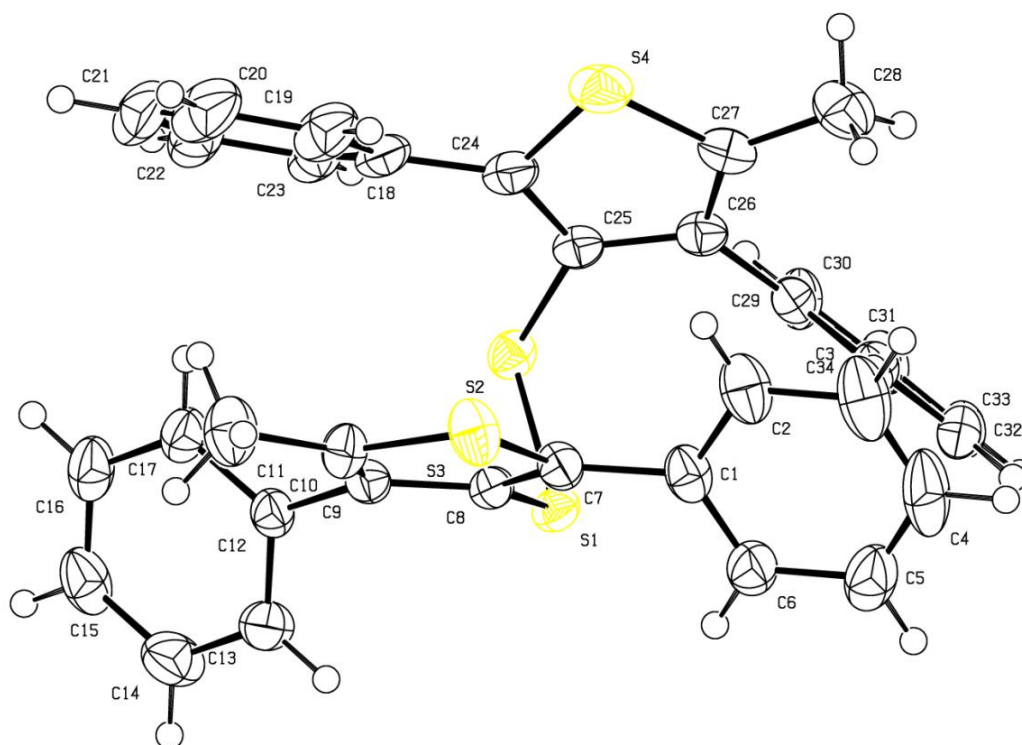

CCDC 1901393 (**4aa**) contains the supplementary crystallographic data for this paper. These data can be obtained free of charge from The Cambridge Crystallographic Data Centre.

## 11. The reaction of 1,4-enynes

The following two reactions have been done to test the reactivity of 1,4-enynes. The results show that 1,4-enynes are not suitable for the sulfur insertion reaction under the optimized conditions.

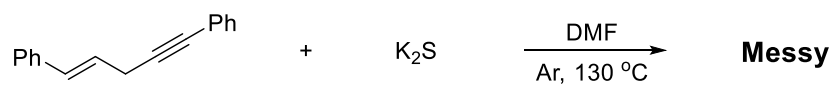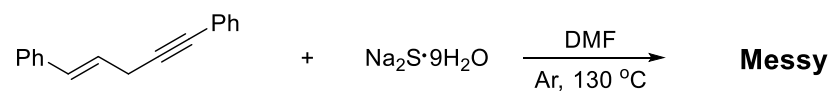

## 12. The reaction of **1aa** under other conditions

We have tried the reactions of **1aa** in the presence of S<sub>8</sub>. It was found that **3aa** and **4aa** were both observed in <10% yields, respectively.

**S<sub>8</sub> alone:**

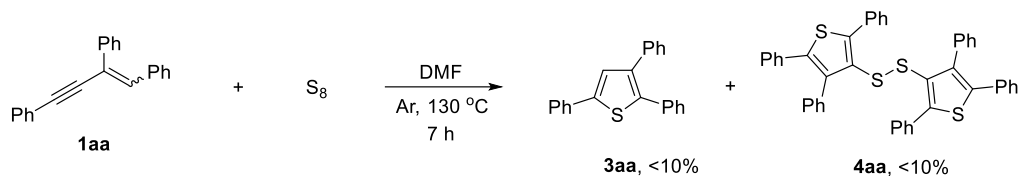

We have also tried the reactions of **1aa** under Prof. Li's conditions (Y. Liu, J.-L. Zhang, R.-J. Song and J.-H. Li, *Org. Lett.* 2014, **16**, 5838–5841). The reaction of K<sub>2</sub>S with **1aa** catalysed by CuCl<sub>2</sub> afforded **3aa** and **4aa** in 18% and 43% yields, respectively. The reaction of Na<sub>2</sub>S·9H<sub>2</sub>O with **1aa** catalysed by CuCl<sub>2</sub> furnished **3aa** in 82% yield and **4aa** was not observed. The reaction of KSCN with **1aa** under Prof. Li's another reaction conditions (J.-X. Yu, S. Niu, M. Hu, J.-N. Xiang and J.-H. Li, *Chem. Commun.* 2019, DOI: 10.1039/c9cc02242b.) failed to give the desired products.

**Li's condition:**

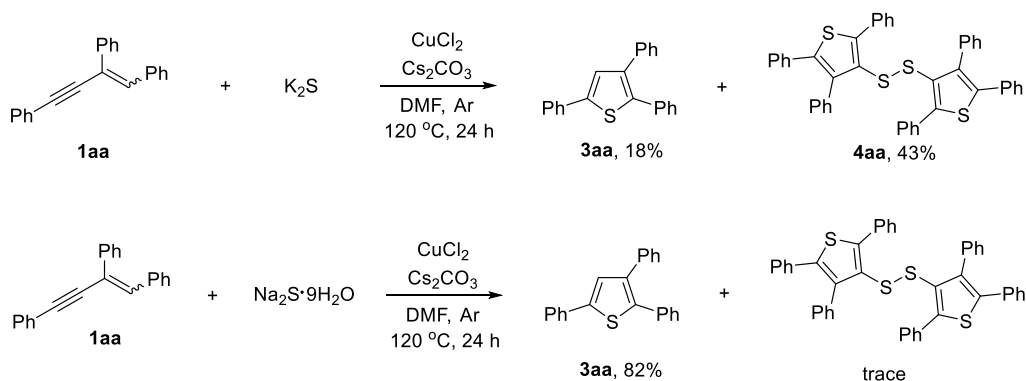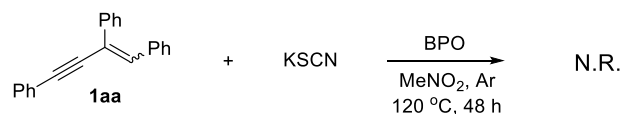

Supplement: c9cc03604k1.pdf [file c9cc03604k1.pdf]
